# Supplementary material
Source: PubMed Central journal article supplement (PMC3549136)
Supplement: 1217107110_sapp.pdf [file 1217107110_sapp.pdf]

## Supporting Information Appendix

### Improving the coverage of the cyanobacterial phylum using diversity-driven genome sequencing

Patrick M. Shih<sup>1,2</sup>, Dongying Wu<sup>1,3</sup>, Amel Latifi<sup>4</sup>, Seth D. Axen<sup>1</sup>, David P. Fewer<sup>5</sup>, Emmanuel Talla<sup>4</sup>, Alexandra Calteau<sup>6</sup>, Fei Cai<sup>1</sup>, Nicole Tandeau de Marsac<sup>4,7</sup>, Rosmarie Rippka<sup>7</sup>, Michael Herdman<sup>7</sup>, Kaarina Sivonen<sup>5</sup>, Therese Coursin<sup>8</sup>, Thierry Laurent<sup>8</sup>, Lynne Goodwin<sup>9</sup>, Matt Nolan<sup>1</sup>, Karen W. Davenport<sup>9</sup>, Cliff S. Han<sup>9</sup>, Edward M. Rubin<sup>1</sup>, Jonathan A. Eisen<sup>1,3</sup>, Tanja Woyke<sup>1</sup>, Muriel Gugger<sup>8\*</sup>, Cheryl A. Kerfeld<sup>1,2\*</sup>

<sup>1</sup>DOE Joint Genome Institute, Walnut Creek, California, 94598, USA.

<sup>2</sup>Department of Plant and Microbial Biology, University of California, Berkeley, California, 94720, USA.

<sup>3</sup>University of California, Davis, Davis, California 95616, USA.

<sup>4</sup>Aix-Marseille University, LCB, CNRS UMR 7283, 13402 Marseille, France.

<sup>5</sup>Food and Environmental Sciences, Division of Microbiology, FIN-00014, University of Helsinki, Finland.

<sup>6</sup>CEA, DSV, IG, Genoscope & CNRS-UMR8030, Laboratoire d'Analyse Bioinformatiques en Génomique et Métabolisme (LABGeM), 91057 Evry, France.

<sup>7</sup>Unité des Cyanobactéries, Institut Pasteur, CNRS URA 2172, 75724 Paris Cedex 15, France.

<sup>8</sup>Collection des Cyanobactéries, Institut Pasteur, 75724 Paris Cedex 15, France.

<sup>9</sup>Los Alamos National Laboratory, Los Alamos, New Mexico 87545, USA.

\*Corresponding Authors

To whom correspondence should be addressed, email: [ckerfeld@lbl.gov](mailto:ckerfeld@lbl.gov) or [mgugger@pasteur.fr](mailto:mgugger@pasteur.fr)

## Table of Contents

|                                        |       |
|----------------------------------------|-------|
| Supporting Materials and Methods ..... | 3-7   |
| Supporting Figures S1-S10 .....        | 8-17  |
| Supporting Tables S1-S9 .....          | 18-34 |
| Datasets .....                         | 35    |
| References .....                       | 36-39 |

## Supplementary Materials and Methods:

The 54 strains used for genome sequencing in this study are available at Pasteur Culture collection of Cyanobacteria ([http://www.pasteur.fr/pcc\\_cyanobacteria](http://www.pasteur.fr/pcc_cyanobacteria)). The 54 sequenced genomes in this study were compared to 72 publicly available cyanobacterial genomes (Table S1).

A sequence similarity matrix was calculated for alignments of 1,813 16S small subunit rRNA sequences of cyanobacterial isolates from the greengenes database, excluding sequences from environmental samples (December 2008). The cyanobacterial isolates were grouped into 104 clusters by MCL clustering performed on the sequence similarity matrix at similarity cutoff of 95% and inflation value of 2. Type strains, PCC identification numbers and the status of previous sequencing efforts were highlighted for all the isolates in the 104 clusters. This analysis, interest of the strains to the research community and their availability at the Pasteur Culture Collection, was used as guide to choose the strains for genome sequencing. For strains chosen, 1.25 L of liquid cultures in late exponential to linear growth phase were centrifuged at 12,000g for 10min at 20°C. After washing twice with sterile distilled water or sterile saline solution (1% NaCl) for marine strains, the pellets were immediately frozen in liquid N<sub>2</sub> prior to being lyophilized. DNA of the lyophilized pellets was extracted using Genomic DNA isolation - NucleoBond® AX (Macherey-Nagel, Hoerd, France) according manufacturer's instructions for bacterial DNA using the columns Nucleobond AX-G 500.

### Genome sequencing and assembly

The 54 CyanoGEBA draft genomes were generated at the DOE Joint Genome Institute (JGI) using either a combination of Illumina (1) and 454 technologies (2) or the Illumina technology (Table S10). The 454 Titanium standard data and the 454 paired end data were assembled using Newbler, versions 2.3 to 2.6, and the resulting consensus sequences were computationally shredded into 2 Kbp overlapping fake reads (shreds). Illumina sequencing data was assembled with Velvet, versions 0.7.55 to 1.105 (3), and the consensus sequence computationally shredded into 1.5 Kbp overlapping fake reads (shreds). The 454 Newbler consensus shreds, the Illumina Velvet consensus shreds and the read pairs in the 454 paired end library were then integrated using parallel Phrap, version SPS - 4.24 (High Performance Software, LLC). The software Consed (4),(5) (6) was used in the following finishing process. Illumina data was used to correct potential base errors and increase consensus quality using the software Polisher developed at JGI. Possible mis-assemblies were corrected using gapResolution, Dupfinisher (7), or sequencing cloned bridging PCR fragments with subcloning. Gaps between contigs were closed by editing in Consed, by PCR and by Bubble PCR primer walks. All general aspects of library construction and sequencing performed at the JGI can be found at <http://www.jgi.doe.gov/>. At Los Alamos National Laboratory (LANL), 25 of these genomes underwent manual finishing efforts, while 20 others underwent autofinishing. Gap closure in autofinishing is fully automated and thus less extensive as compared to manually finishing. The 9 remaining CyanoGEBA genomes were not subjected to

finishing efforts. For PCC 9605 and PCC 10914, all raw Illumina sequence data was passed through DUK, a filtering program developed at JGI, which removes known Illumina sequencing and library preparation artifacts. Illumina sequence reads were assembled using Allpaths-LG versions 38118 (PCC 9339), 38445 (PCC 9431, PCC 10914, PCC 7702) and 39750 (PCC 9605). For PCC 73106, PCC 7509, and PCC 6406, following steps were performed for genome assembly: 1) filtered Illumina reads were assembled using Velvet (3), 2) 1-3 Kbp simulated paired end reads were created from Velvet contigs using wgsim (<https://github.com/lh3/wgsim>), 3) Illumina reads were assembled with simulated read pairs using Allpaths-LG (versions 37843 and 38118) (8).

### **Genome annotation**

Genes were identified using Prodigal (9), followed by a round of manual curation using GenePRIMP (10) for finished genomes and draft genomes in fewer than 10 scaffolds. The predicted CDSs were translated and used to search the National Center for Biotechnology Information (NCBI) nonredundant database, UniProt, TIGRFam, Pfam, KEGG, COG, and InterPro databases. The tRNAScanSE tool (11) was used to find tRNA genes, whereas ribosomal RNA genes were found by searches against models of the ribosomal RNA genes built from SILVA (12). Other non-coding RNAs such as the RNA components of the protein secretion complex and the RNase P were identified by searching the genome for the corresponding Rfam profiles using INFERNAL (<http://infernal.janelia.org>). Additional gene prediction analysis and manual functional annotation was performed within the Integrated Microbial Genomes (IMG) platform (<http://img.jgi.doe.gov>) developed by the Joint Genome Institute, Walnut Creek, CA, USA (13).

### **Species tree**

The Species tree was generated by a concatenation of thirty-one conserved proteins as described by Wu et al. (14). Homologs of each ribosomal protein were identified using reciprocal BLAST of the 49 publicly available cyanobacterial genomes in IMG at the end of 2009. These gene families were aligned using MAFFT, using the maxiterative function (15). The subsequent alignment was used to create Hidden Markov Models (HMMs) for the respective ribosomal protein using HMMer v.2.0 (16). Total protein coding sequences for each cyanobacterial genome, and of four outgroups (*Chloroflexus auranticus* J-10, *Rhodobacter sphaeroides* 2.4.1, *Heliobacterium modesticaldum* Ice1, and *Chlorobium tepidum* TLS) were retrieved using IMG (13). Using HMMer, the hmmsearch function was used to identify orthologs and align them using the hmalign function. The resulting thirty-one alignments were then concatenated. The default setting to omit gappy columns was used with the software Belvu (17). A phylogenetic tree was generated with the alignment using PhyML (18). The LG amino acid substitution model was chosen using ProtTest with gamma-distributed rate variation (four categories) and estimation of a proportion of invariable sites (19).

### **Tree Imbalance study**

Two trees, one with all cyanobacterial genomes (126 species) and one with only the 72 publicly available were generated. The alignments and the phylogenetic trees were generated using the same methods described to construct the Species Tree. *Gloeobacter*

*violaceus* PCC 7421 was set as the outgroup in both trees. The tree imbalance of both trees was measured using Colless' Imbalance in the software Mesquite (20, 21). The tree depth was set to 10 and 1000 simulations of both uniform and equiprobable speciations were conducted.

### **16S rRNA phylogeny**

A phylogeny using 16S rRNA sequences retrieved from IMG for all cyanobacteria of this study was generated to compare to the Species tree. Due to incomplete or partial sequences, *Arthrospira* sp. PCC 8005, *Synechococcus* sp. CB 0101, *Synechococcus* sp. CB 0205, and *Crocospaera watsonii* WH 0003 were omitted from this phylogeny. Sequences were aligned in MAFFT. A maximum likelihood tree was generated using PhyML, using the GTR model with gamma-distributed rate variation (four categories) and an estimation of proportion of invariable sites.

### **Identification of novel proteins**

All 292,935 proteins from the CyanoGEBA genomes were searched against the entire amino acid non-redundant (nr) database downloaded from NCBI, updated April 2<sup>nd</sup>, 2012, using BLASTP set at an e-value cutoff of 1e-2. The 21,107 proteins with no hits were considered 'novel' as they have no homology to the nr database.

### **Morphological transitions analysis**

Protein families generated from MCL analysis was used. The specific nodes tested for morphological transitions are indicated in Fig. 1. A set of genes involved in the morphological transition were defined by comparison of presence in one genome or a set of genome belonging to a subsection and their absence in another genome or a set of genomes as reported in Table S5. Moreover, a BLASTP search of the 32 proteins from *Prochlorothrix hollandica* PCC 9006 from Event 2 against the 674 proteins from Event 3 was done, yielding 29 out of the 32 hits. We generated a null hypothesis to verify the enrichment in 29 out of the 32 homologous proteins by randomly sampling the *Prochlorothrix hollandica* PCC 9006 genome against the 674 proteins from Event 3 with BLASTP, 10,000 times, which showed that the value (29 out of 32 proteins) was significant (p-value = 0).

### **Heterocyst, hormogonium, and akinete related gene distribution analysis**

Seed proteins (29 and 20 are involved in cell division and cell differentiation, respectively) were downloaded from the cyanobase (<http://genome.kazusa.or.jp/cyanobase>) and used for BLAST comparison searches. Putative orthology relationships between a seed protein and other cyanobacterial proteins were defined by an alignment threshold of at least 30% sequence identity with an e-value lower than 1e-10.

### **COG functional categories**

Clusters of Orthologous Groups (COG) functional category data was downloaded by Morphological Subsection from the IMG database.

### **Plastidome tree**

The plastidome tree was generated by a concatenation of twenty-five conserved plastid proteins using the same method to generate the species tree. Proteins from fully sequenced plastid genomes were downloaded from the High-quality Automated and Manual Annotation of microbial Proteins (HAMAP) database (22). Plastids downloaded from HAMAP were: *Cyanophora paradoxa*, *Chaetosphaeridium globosum*, *Anthoceros formosae*, *Cycas taitungensis*, *Arabidopsis thaliana*, *Amborella trichopoda*, *Selaginella uncinata*, *Zygnema circumcarinatum*, *Staurostrum punctulatum*, *Chara vulgaris*, *Nephroselmis olivacea*, *Ostreococcus tauri*, *Bigelowiella natans*, *Chlorella vulgaris*, *Pseudendoclonium akinetum*, *Oltmannsiellopsis viridis*, *Scenedesmus obliquus*, *Chlamydomonas reinhardtii*, *Stigeoclonium helveticum*, *Oedogonium cardiacum*, *Euglena gracilis*, *Mesostigma viride*, *Chlorokybus atmophyticus*, *Cyanidioschyzon merolae*, *Cyanidium caldarium*, *Porphyra yezoensis*, *Porphyra purpurea*, *Gracilaria tenuistipitata* var. *liui*, *Rhodomonas salina*, *Guillardia theta*, *Emiliana huxleyi*, *Phaeodactylum tricornerutum*, *Odontella sinensis*, *Thalassiosira pseudonana*, *Vaucheria litorea*, *Heterosigma akashiwo* CCMP452, *Heterosigma akashiwo* NIES293, and the chromatophore of *Paulinella chromatophora*. A phylogenetic tree was generated with the alignment using PhyML 3.0. The LG amino acid substitution model was chosen by ProtTest and with gamma-distributed rate variation (four categories) and estimation of a proportion of invariable sites. The tree was rooted to *Gloeobacter violaceus* PCC 7421.

### **Prediction of Endosymbiotic Gene Transfer.**

Proteins from the genomes used in this study were divided into four groups: 1) Nuclear genomes from plastid-containing eukaryotes (Table S8), 2) Bacteria not from the phylum *Cyanobacteria* (*Agrobacterium tumefaciens* C58-Cereon, *Aquifex aeolicus* VF5, *Bacillus subtilis subtilis* 168, *Caulobacter crescentus* CB15, *Chlamydia trachomatis* E/150, *Chlorobium limicola* DSM 245, *Chloroflexus aurantiacus* J-10-fl, *Heliobacterium modesticaldum* Ice1, Candidatus *Kuenenia stuttgartiensis*, *Rickettsia peacockii* Rustic, *Thermotoga maritima* MSB8), 3) Archaea (*Archaeoglobus fulgidus* VC-16, DSM 4304, *Cenarchaeum symbiosum* A, *Methanocaldococcus jannaschii* DSM 2661, *Nanoarchaeum equitans* Kin4-M, *Sulfolobus acidocaldarius* DSM 639), 4) Eukaryotes presumably not containing plastids derived from endosymbiosis (*Caenorhabditis elegans* Bristol N2, *Cryptococcus neoformans* var. *neoformans* JEC 21, *Drosophila melanogaster*, *Monosiga brevicollis* MX1, *Saccharomyces cerevisiae* S288C). The nuclear proteins from Group 1 were used as queries to BLASTP against two databases: 1) all proteins from Groups 2-4 and all cyanobacterial proteins in this study (CyanoGEBA and publicly-available genomes), and 2) all proteins from Groups 2-4 and cyanobacterial proteins from only publicly-available genomes. Those with top-hits to cyanobacterial proteins were considered genes of cyanobacterial descent, and the total counts for each of the nuclear genomes from Group 1 are described in Table S8 and Dataset S3. COGs for all proteins were assigned using the same methods as in the IMG pipeline (13).

### **Chlorophyll Binding Protein (CBP) studies**

#### Phylogenetic analysis

CBP homologs were collected by performing a BLASTP search on all cyanobacteria in the IMG database using the inner chlorophyll-binding antenna protein CP43 of PSII from *Thermosynechococcus elongatus* BP-1 as the query, setting and e-value threshold of 1e-

10. All homologs were aligned using MAFFT. The alignment was used to build a maximum likelihood phylogenetic tree in PhyML, under the LG model with gamma-distributed rate variation (four categories) and an estimation of a proportion of invariable sites, after choosing the best-suited model in ProtTest.

#### Alignment and analysis of chlorophyll binding amino acids

An alignment of a subset of CBP proteins was generated in order to investigate the presence of conserved amino acids that are known to ligate chlorophyll to the protein. The amino acid sequences for the N- and C- termini of PsaA and PsaB, PsbB, PsbC, and IsiA from *Thermosynechococcus elongatus* were aligned to various CBP; the sequences were aligned using MAFFT, followed by manual curation of the alignment, using only the alignments of the first six helices (Fig. S6).

Further analysis of the C-terminal PsaL-like domain of the CBPV was carried out by truncating CBPV sequences to examine specifically the ladder domain. PsaL subunits from *Synechococcus elongatus* PCC 7942, *Synechocystis* sp. PCC 6803, and *Thermosynechococcus elongatus* BP1 were aligned with the truncated CPBV sequences using MAFFT (Fig. S7).

#### Homology model

The CBPV homolog from *Chroococcidiopsis thermalis* PCC 7203 (Chro\_2988) was submitted to the SWISS-MODEL web server (<http://swissmodel.expasy.org/>) for three-dimensional structural homology modeling. Two homology models were made. 1) The N-terminal domain (first six transmembrane helices) was homology modeled off of the template from the Protein Data Bank, 3ARC\_C (the PsbC subunit of Photosystem II from *Thermosynechococcus vulcanus* modeling amino acid positions 6-346). The C-terminal domain (last three transmembrane helices) was modeled off of the template, 1JB0\_L (the PsaL subunit of Photosystem I from *Synechococcus elongatus* modeling amino acid positions 342-504). The last five amino acids were removed from the N-terminal domain and the C-terminal domain was positioned near it using PyMol (<http://www.pymol.org/>). A monomeric subunit of the Photosystem I structure, 1JB0, was used to model the CBPV homolog interaction when replacing the PsaL subunit (Fig. S8).

#### **CRISPR analysis**

CRISPRs (Clustered Regularly Interspaced Short Palindromic Repeats) loci were predicted using both CRISPRfinder (23) and CRISPR Recognition Tool (24) (CRT, which is integrated into the IMG pipeline). The presence of CRISPR/Cas systems was confirmed by examining the co-existence of CRISPR loci and the ubiquitous CRISPR-associated (*cas*) genes, namely *cas1* and *cas2*, within one genome.

# Figures S1-S10

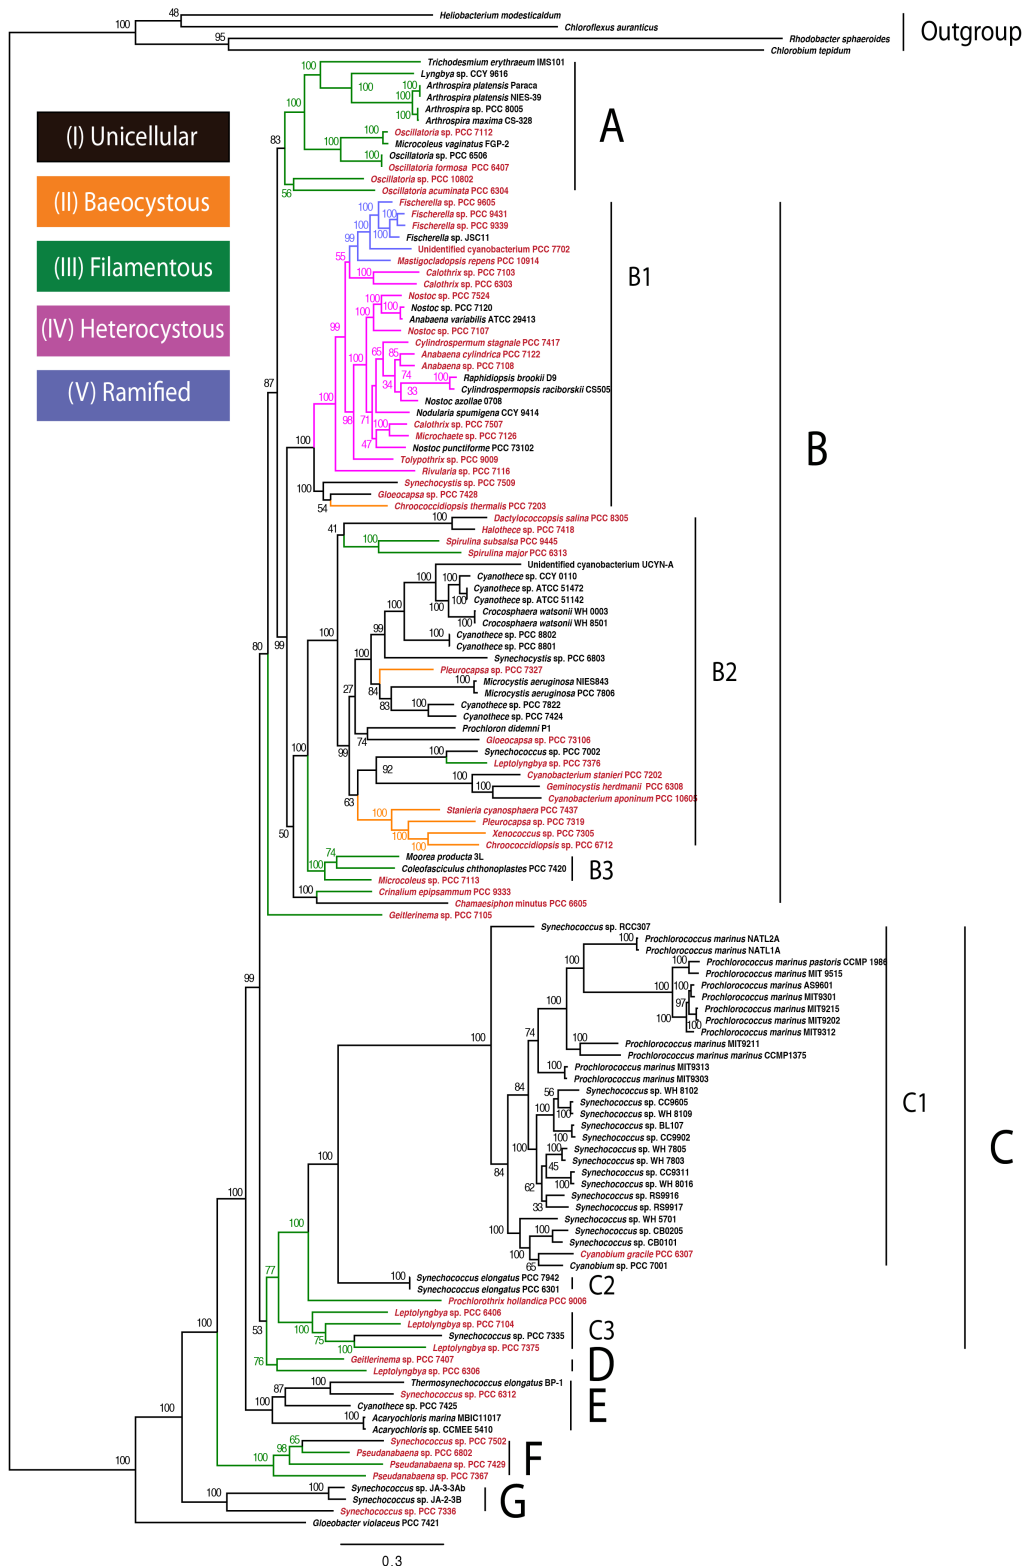

Figure S1. Maximum likelihood tree of *Cyanobacteria* with bootstrap support



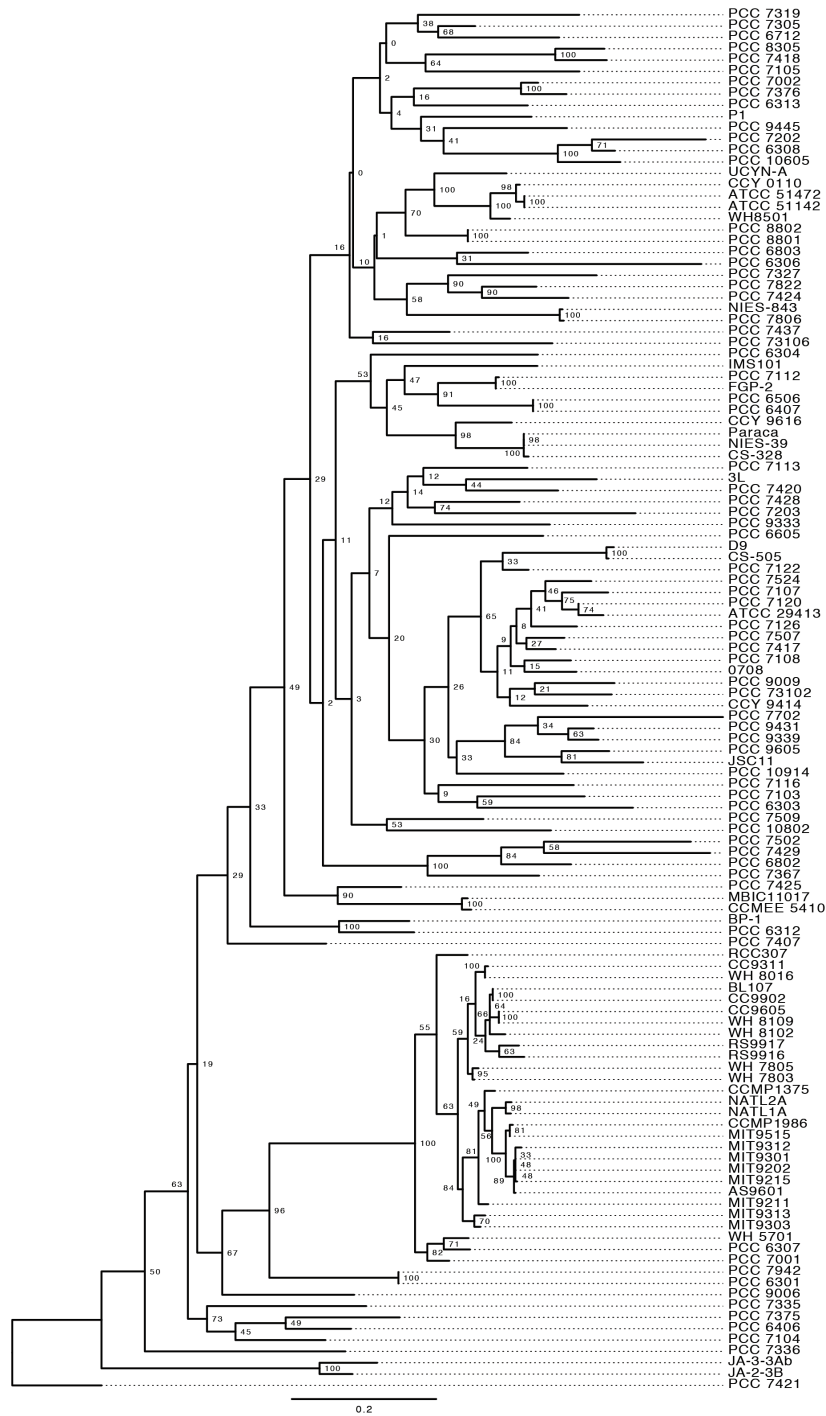

**Figure S2. 16S rRNA gene phylogeny of *Cyanobacteria*.** Maximum Likelihood tree based on 16S rRNA gene sequences from cyanobacteria included in this study and named accordingly to the Strain\_ID in Table S1. Many of the clades defined in Fig. 1 are retrieved in 16S rRNA gene phylogeny. However, given poor bootstrap supports in the latter, there are incongruences between the topologies of the two trees.

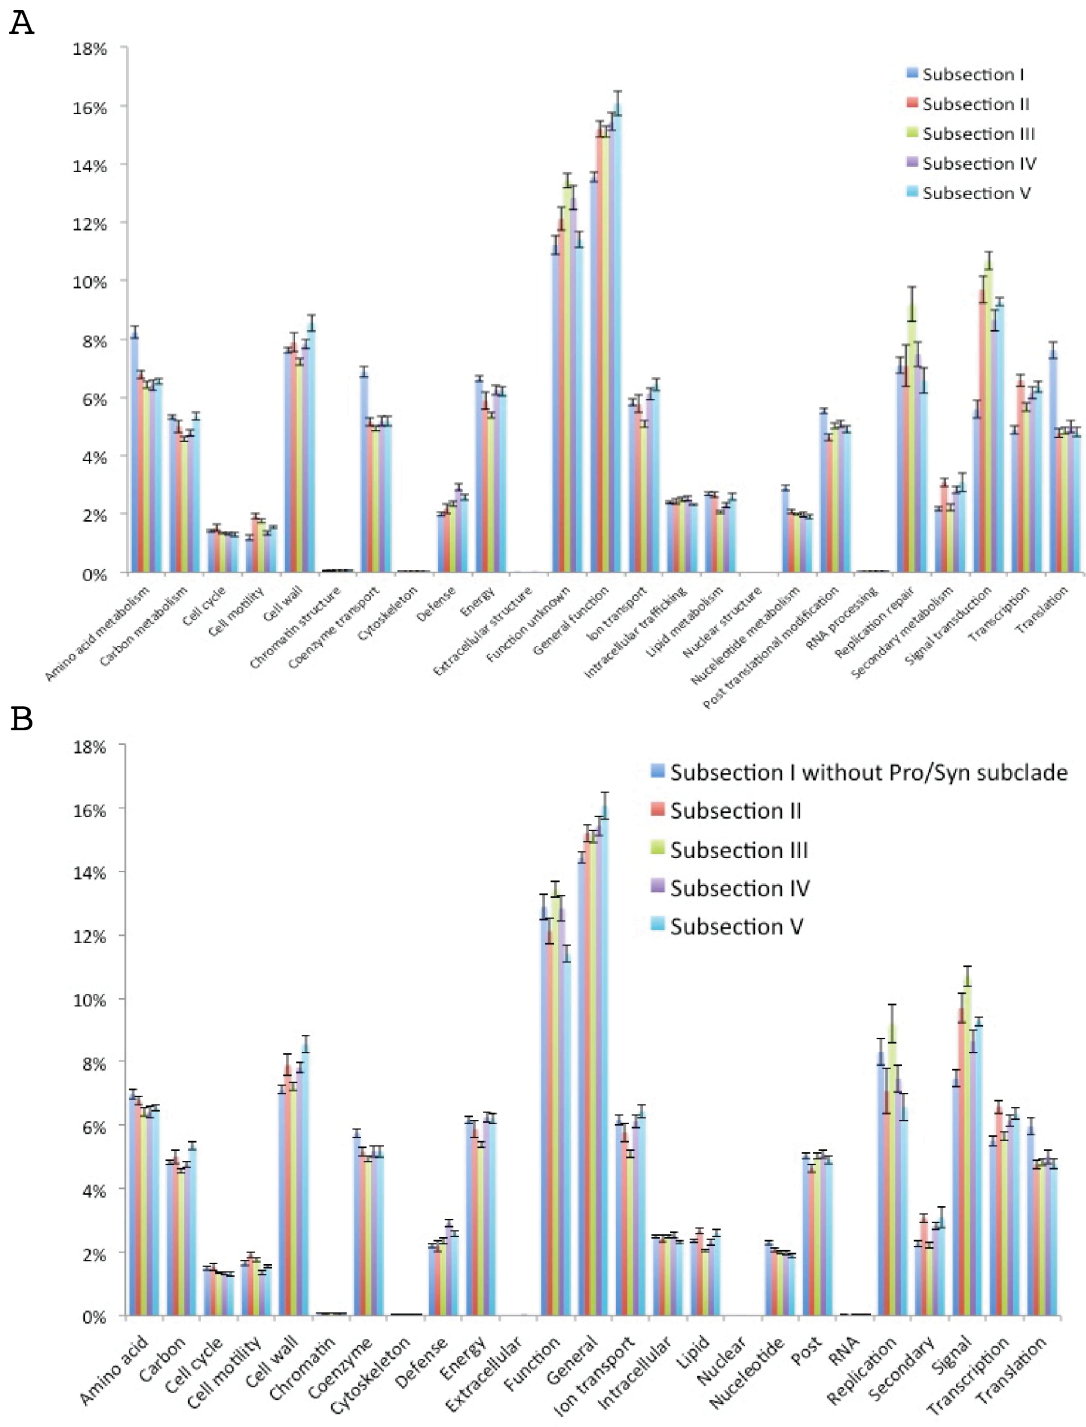

**Figure S3. COG functional categories within morphological subsections.** Bars represent the standard error given the sampling size of each morphological Subsection. **A**, COG analysis of all cyanobacteria included in this study. **B**, COG analysis of all cyanobacteria, excluding the *Prochlorococcus/Synechococcus* subclade in order to decrease bias within Subsection I.

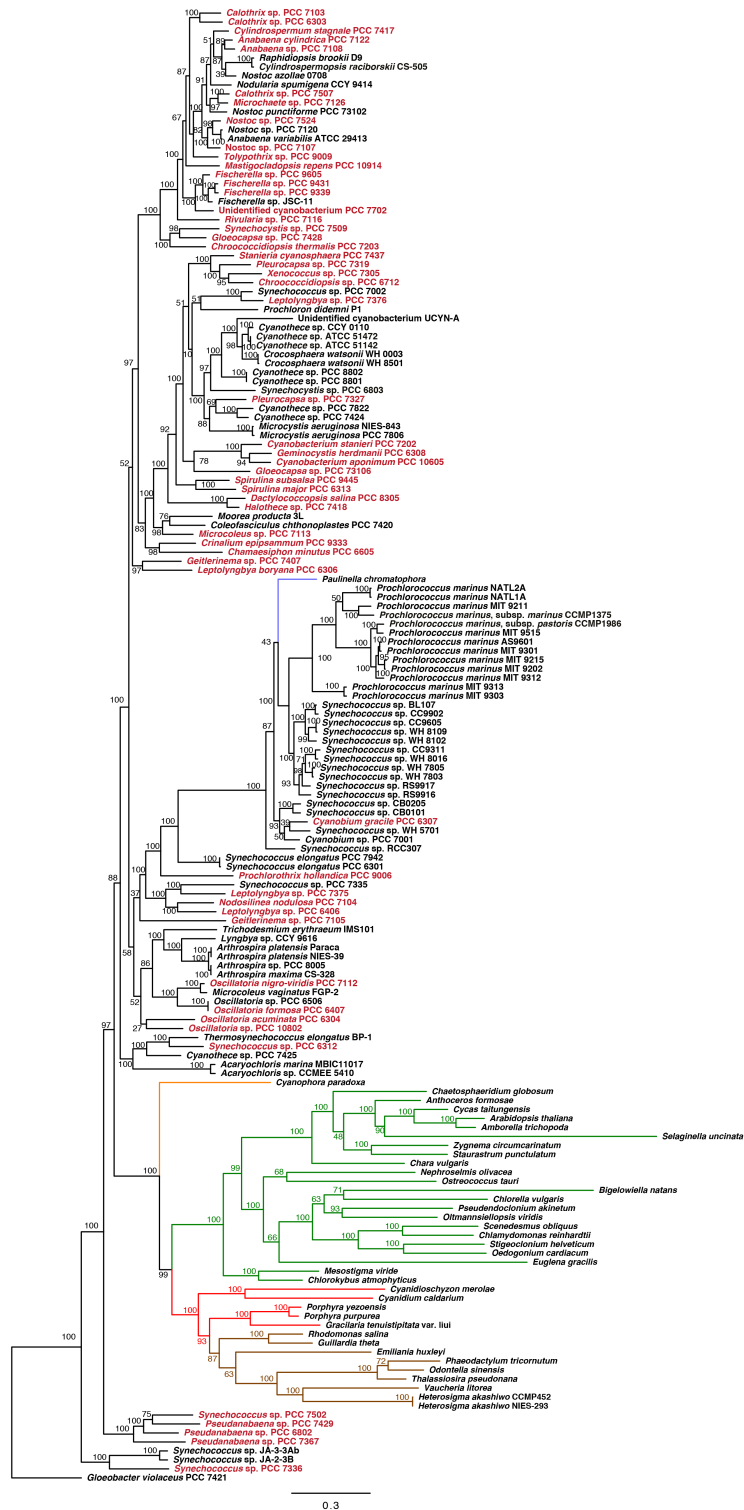

**Figure S4. Maximum likelihood plastidome tree with full names and bootstrap support. Cyanobacteria are named according to the Strain ID in Table S1.**

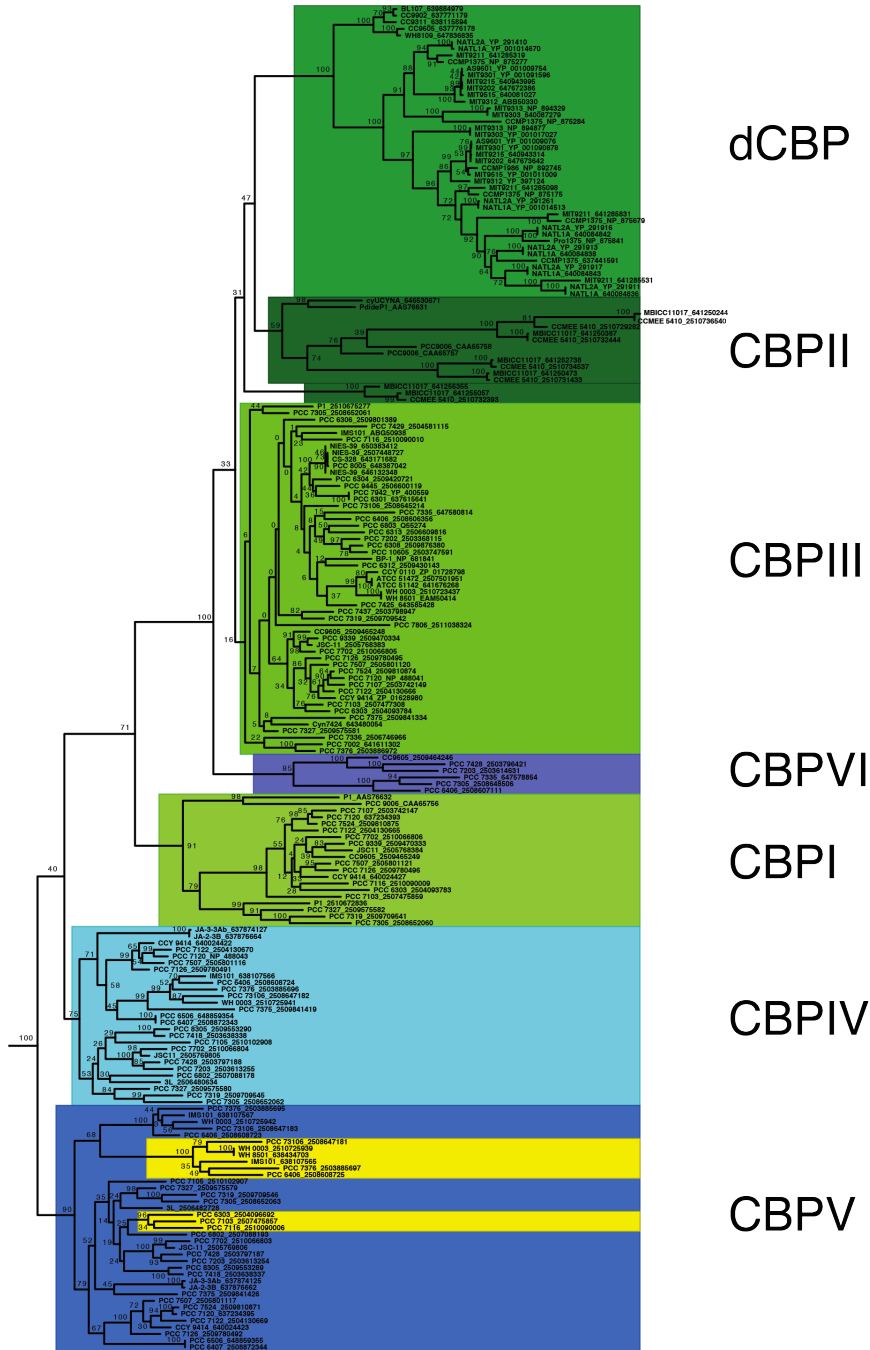

**Figure S5. Maximum-likelihood CBP phylogeny reveals a diversity of previously uncharacterized clades.** CP43 sequences are used as an outgroup (not shown, Newick file is available upon request), while the major CBP clades are color-coded. Shades of green represent previously characterized CBP clades (divinyl CBP = dCBP for their use of divinyl chlorophyll), whereas shades of blue represent new clades distinctly supported with the addition of CyanoGEBAs genomes. Yellow subclades indicate CBPV proteins that lack the C-terminal PsaL-like domain. We find very little support for subclades CBPIII and CBPII. Taxa are named by their strain IDs abbreviation and followed by their IMG Gene Object ID or their GenBank Accessions.

|                     | Helix 1                                                      | Helix 2 |
|---------------------|--------------------------------------------------------------|---------|
| BP-1_CP43           | LLGAVVAHAGLIVFWAGAMTLFEL-----VGVVHLISSAVLGFGGVYAIRGP---      |         |
| BP-1_CP47           | LIAAHLMTALVAGWAGSMALYEL-----VALAIVLSGLLFLAACWVWVYWD---       |         |
| BP-1_PsaA           | IFSAHFGHLAVVFIWLSGMYFHGA-----TAIGGLVMAGLMLFAGWFFYHKRA---     |         |
| BP-1_PsaB           | IFASHFGHLAIFLWVSGSLFHVA-----GAIPLLLIASLALFAGWLLQPKF---       |         |
| BP-1_IsiA_CBPIII    | FIAAFVAQAALSVFWAGFTLYEIEI-----IGAVHLISSAVLGAGALFTFRAP---     |         |
| CCMP1375_PcbC_dCBP  | FIAAHAHAGLMMFWAGFTLFEL-----I AVLHLIFSGVLGAGGLLSMRYE---       |         |
| MIT9313_PcbA_dCBP   | FIASHHGTGLICFGAGANTLFEL-----VAVFLIFSAVYAGGAMLSFRYK---        |         |
| CCMP1986_PcbA_dCBP  | FIAAFVAHAGLIVFWAGFTLFEL-----IAIVHLVSSMVLAAAGGLLSLLLP---      |         |
| PCC_9006_PcbC_CBPI  | LLGARIAHAGLIAFWAGSITVLEV-----IGILHLVTSAVLGAGGLPFTFKGP---     |         |
| MBIC11017_PcbC_CBPI | LLGARLCHAALMSVVPGAFIVQEV-----IGVLEFFIAAVCCAAGLFTFRGE---      |         |
| P1_PcbA_CBPII       | WLAAFVAQAALIVFWAGAICLFEV-----VGVVHLVSSAVIGAGGLYSLRGP---      |         |
| PCC_7120_CBPIV      | LLGAVVAHAGLIVLWAGATTLFEL-----IGVLEHLISSAFLGLGGIFPALLGP---    |         |
| PCC_6406_CBPIV      | LLGARVAHAGLIVFWAGAITLFEV-----IGALHLISSAFLGAGGIFPALARGP---    |         |
| PCC_7375_CBPIV      | LLGARVAHAGLIVLWAGLITLFEV-----VGAVHLISSAFLGFGGIFPALKGP---     |         |
| PCC_7203_CBPIV      | LLGARVAHAGLIVFWAGAMTLFEL-----IGSILHLISSAFLGYGGIFPALARGP---   |         |
| PCC_7120_CBPV       | LLGARVAHAGLIILWAGAMTLFEI-----IGVHLVSSAVLAAGGIYFALLGP---      |         |
| PCC_7203_CBPV       | LLGARVAHAGLILWAGGMTLFEI-----ISVLEHLIPSVILAAGGIYFALLGP---     |         |
| PCC_7375_CBPV       | LLGARVAHAGLITLWAGAMTLFEL-----VGMFHLVASAVLGAGGLYSFLGP---      |         |
| PCC_6406_CBPV       | LLGARVAHAGLIVFWAGAMTLFEL-----IGMVLHLSAAVLGAGGIYFVAVLGP---    |         |
| PCC_6406_CPBPV      | LLGARVAHAGLIVLWAGAMTLFEL-----IGVHLISSAVLGAGGLYFVAVLGP---     |         |
| PCC_6406_CBPVI      | FIVAFVAQAALIMFWAGFTLFEL-----IGVHLVVAAGVLAGGAYFRERLGG---      |         |
| PCC_7203_CBPVI      | FLTAHIAHAAIVSFSIGALILLEI-----FGVVLVSAAVFTAGTLFERSQVP---      |         |
|                     |                                                              |         |
|                     | Helix 3                                                      | Helix 4 |
| BP-1_CP43           | ---ILGFHLI-VLGGIALLLVAKAMFFG-----VVGGLIHWIGLICIAGGIWHIL----  |         |
| BP-1_CP47           | ---MFGIHLF-LAGL--LCFGFGAFHLT-----VVAHDLAAGIVGIIAGLFIHIL----  |         |
| BP-1_PsaA           | ---MLNHLIAGLLGLSLAWAGHQIHVS-----TAHHLAIAVLFITAG--RMY-----    |         |
| BP-1_PsaB           | ---RLNHLIAGLFGVSSLAWAGHLIHVA-----MAHHLAIAVLFIVAG--RMY-----   |         |
| BP-1_IsiA_CBPIII    | ---ILGHLL-FLGFGALLVLKATIWG-----LVGGHYIAILLIAGGIWHIL----      |         |
| CCMP1375_PcbC_dCBP  | ---ILGHLLI-FLGLGNIQFVEWARIH-----VMGGHAFLAFFLIIGGAFHIA-----   |         |
| MIT9313_PcbA_dCBP   | ---ILGHLL-FLGLGCQVFEWAKYH-----VMGGHAFLAFFLSAGAIWHIF----      |         |
| CCMP1986_PcbA_dCBP  | ---ILGHLLI-ILGFVILLVVEWARVH-----VMGGHAFLAFLVLTGGAWHIA-----   |         |
| PCC_9006_PcbC_CBPI  | ---ILGHLL-LLGILCLAFVAKAMFWG-----IIGGVHYIGILELIGGTWHIL----    |         |
| MBIC11017_PcbC_CBPI | ---IVGHLLV-FISVACLIFAVNATYGT-----VIGGFLIGVIDLLGAAFHIL----    |         |
| P1_PcbA_CBPII       | ---ILGHLLI-LLGLGALFLVLWAVFF-----LIGGHYVVAIIEISGGLWHIF----    |         |
| PCC_7120_CBPIV      | ---ILGHLLV-LLGLGAGLLVAKAVFFG-----LVGGHIWVSILCIAGGLWHIF----   |         |
| PCC_6406_CBPIV      | ---ILGHLLV-LLGLGTFLLVTRKAMIFG-----AVGGHIWVGLMCMGLGGIWHMR---- |         |
| PCC_7375_CBPIV      | ---ILGHLLV-LLGGGALLLVAKAIFLG-----VVGGLHYIGIVLILGGGLWHIF----  |         |
| PCC_7203_CBPIV      | ---ILGHLLV-LLGIGAFLLVAKAMYFG-----VVGGLIHWVGILILGGGLFHIA----  |         |
| PCC_7120_CBPV       | ---IIGHLL-LLGAGAWLLVAKALFWG-----VVGGLIHWVGILCIAGGFWHIL----   |         |
| PCC_7203_CBPV       | ---ILGHLLM-LLGLGALLLVAKAMFWG-----IVGGHIWVGILIGGGIFHIL----    |         |
| PCC_7375_CBPV       | ---IIGHLLV-LLGLGAWLLVAKAMFWG-----IVGGHLWVGLMCMVGLGGIWHIF---- |         |
| PCC_6406_CBPV       | ---ILGHLLM-LLGIGALLLVKAGYFG-----LVGGHFWVALLCLGGGFWHIM----    |         |
| PCC_6406_CPBPV      | ---ILGHLLV-LLGVGALLLVVKATTFG-----VVGGLHWIGAIILGGIWHIF----    |         |
| PCC_6406_CBPVI      | ---ILGHLLA-ILGLGALLLVVKATAFG-----LVGGHYVAVLLLLGGAWHIL----    |         |
| PCC_7203_CBPVI      | ---ILGNLLI-FLGIGALLLVAKAMFFG-----VVGGLHYVGAALLVAGIWHMI----   |         |
|                     |                                                              |         |
|                     | Helix 5                                                      | Helix 6 |
| BP-1_CP43           | -LSYSLGA-----LSMMGFATCFVWFN-----WLATSHFVLAFF-FLVGLLWHLFAG    |         |
| BP-1_CP47           | -LSSSIAA-----VFFAAVAVAGTMWYG-----WFTFAHAFVALL-FFGHLIWHGA     |         |
| BP-1_PsaA           | -LTTSWHAQLAINLAMMGSLSIIVAQHM-----SLFTHMMWIGGF-LVVGGAANGA     |         |
| BP-1_PsaB           | -YNNSLHFQLGWHLACLGVITSLVAQHM-----ALYTHHQQYIAGF-LMVGAFAHGA    |         |
| BP-1_IsiA_CBPIII    | -LSYSLGG-----IALAGFVAAYFCAVN-----WLANAHFFLAFF-FLQGLLWHLAL    |         |
| CCMP1375_PcbC_dCBP  | -LSYSLAG-----VAYCAFVAAFWCATN-----WLSNHFYLGFF-FLQGLLWHLAL     |         |
| MIT9313_PcbA_dCBP   | -LSTSLAG-----AAFIAFVAAFWASMN-----WLSNHFYLGFF-YLQGLFWHGL      |         |
| CCMP1986_PcbA_dCBP  | -LSWSLAG-----IGWMAIIAAFWSASN-----WLANVHYFAGFF-FIQGLLWHLAL    |         |
| PCC_9006_PcbC_CBPI  | -LSYSLGA-----VGMWGLLSGFFVRYC-----GAAAVQYILGVL-LLVGVVWHEAT    |         |
| MBIC11017_PcbC_CBPI | -LSWSVAS-----VGMGSISSSLFIRYC-----GAATLQLILGLVWMLGGGLWHLAL    |         |
| P1_PcbA_CBPII       | -LAYALGG-----LAIMGFTAAYVCAFN-----WLCNVHFFLAFF-VLQGLLWHLAL    |         |
| PCC_7120_CBPIV      | -LSYSLGA-----LSLMSLIAAYFVSVN-----WLANAHFWLGFF-FLQGLLWHLAL    |         |
| PCC_6406_CBPIV      | -LSYSIGA-----VSLMAFVATLFVSVN-----WLANAHFWLGFF-FLQGLLWHLAL    |         |
| PCC_7375_CBPIV      | -LAYSIGA-----LSLMTFVATLFVSVN-----WLANAHFWLGFF-FLQGLLWHLAL    |         |
| PCC_7203_CBPIV      | -LSYSLGA-----LALMGFIATLFVSVN-----WLANTHFWLAFF-FLQGLLWHLAL    |         |
| PCC_7120_CBPV       | -LSYSLAA-----LAYMGLLAAYFVTVN-----WLATSHFALAIIV-FLSGLIWHAL    |         |
| PCC_7203_CBPV       | -LAYSIGA-----VAYMGFFAAYFASVN-----WLVSPHFVLAIV-FLLGLIWHAL     |         |
| PCC_7375_CBPV       | -LSYSLGA-----LAYMGI FAGYFVTVN-----WLAAPHFAPGGL-LLAGLWHLAI    |         |
| PCC_6406_CBPV       | -LSYSLGA-----LAIAGLSVAVFVSVN-----ALASVHAGLGFL-ALLGLWHLAC     |         |
| PCC_6406_CPBPV      | -LAYSQAA-----LAYMGFFAAYFVWVN-----WMLLHFVVFPASL-LLAGLWHLGL    |         |
| PCC_6406_CBPVI      | -LSYSLFG-----IALAGFAASYCGFN-----WLANAHFYLAFF-FLQGLLWHLAL     |         |
| PCC_7203_CBPVI      | -LSYSLFS-----LALTGFAGSYFCGFN-----WLANTYFYLSFF-TLQGLLWHLAL    |         |

**Figure S6. Newly characterized CBP clades have conserved residues for potentially binding chlorophyll.** Alignment of the transmembrane helices of CBP proteins and similar light-harvesting proteins. Amino acids highlighted in green (histidine) and yellow (glutamine) correspond to putative chlorophyll-binding residues. Organisms are named accordingly to the Strain ID of Table S1.

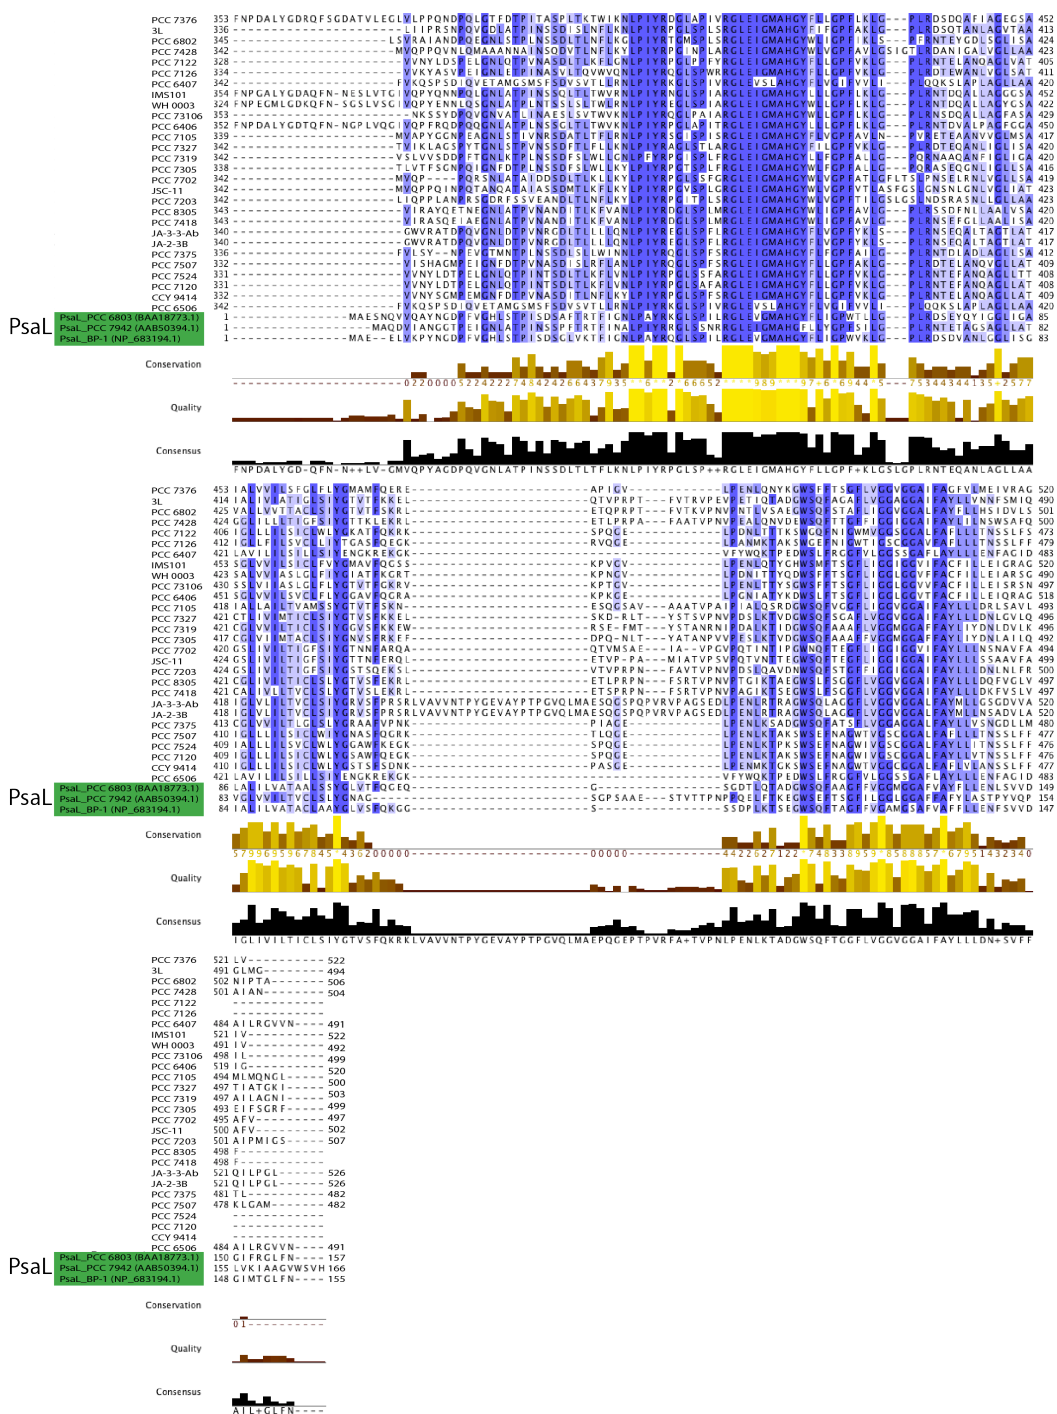

**Figure S7. The C-terminal PsaL-like domain of CBPV proteins is homologous to PsaL.** Alignment of the C-terminal PsaL-like domain of CBPV proteins containing full-length PsaL domains to the canonical PsaL of PSI (highlighted green accessions mark the amino acid sequences of the PsaL subunits of *Synechococcus elongatus* PCC 7942, *Synechocystis* sp. PCC 6803, and *Thermosynechococcus elongatus* BP-1. Organisms are named accordingly to the Strain ID of Table S1.

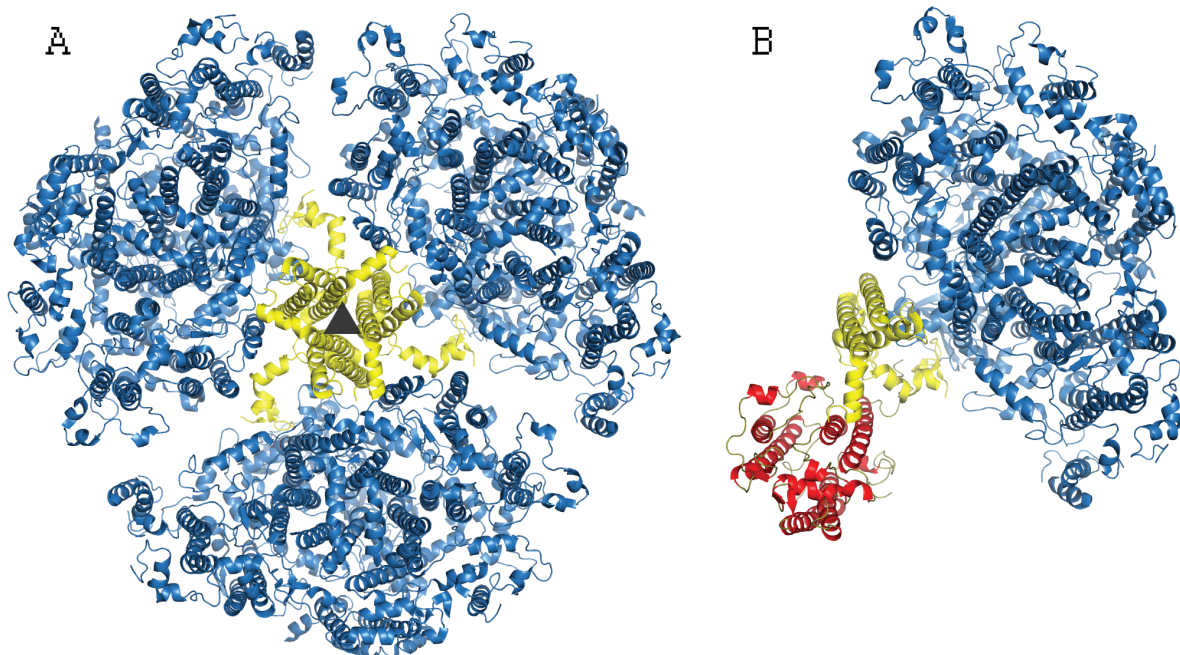

**Figure S8. Comparison of trimeric Photosystem I to proposed CBPV-Photosystem I complex model.** **A**, Top view of trimeric Photosystem I structure of *Thermosynechococcus elongatus* from the Protein Data Bank structure, 1JB0 (PDB ID). The threefold symmetry axis is denoted by the black triangle in the center. PsaL subunits are highlighted in yellow. **B**, Top view of proposed model of CBPV from *Chroococcidiopsis thermalis* PCC 7203 (Chro\_2988) interacting with the Photosystem I monomer from the upper right of the trimer. Replacing the PsaL subunit (yellow) of a monomeric PSI with the PsaL-like domain of CBPV would preclude trimer formation, potentially resulting in monomerization of Photosystem I. The CBP domain (first six helices) is highlighted in red, whereas the monomeric Photosystem I, excluding the PsaL subunit, is highlighted in yellow.

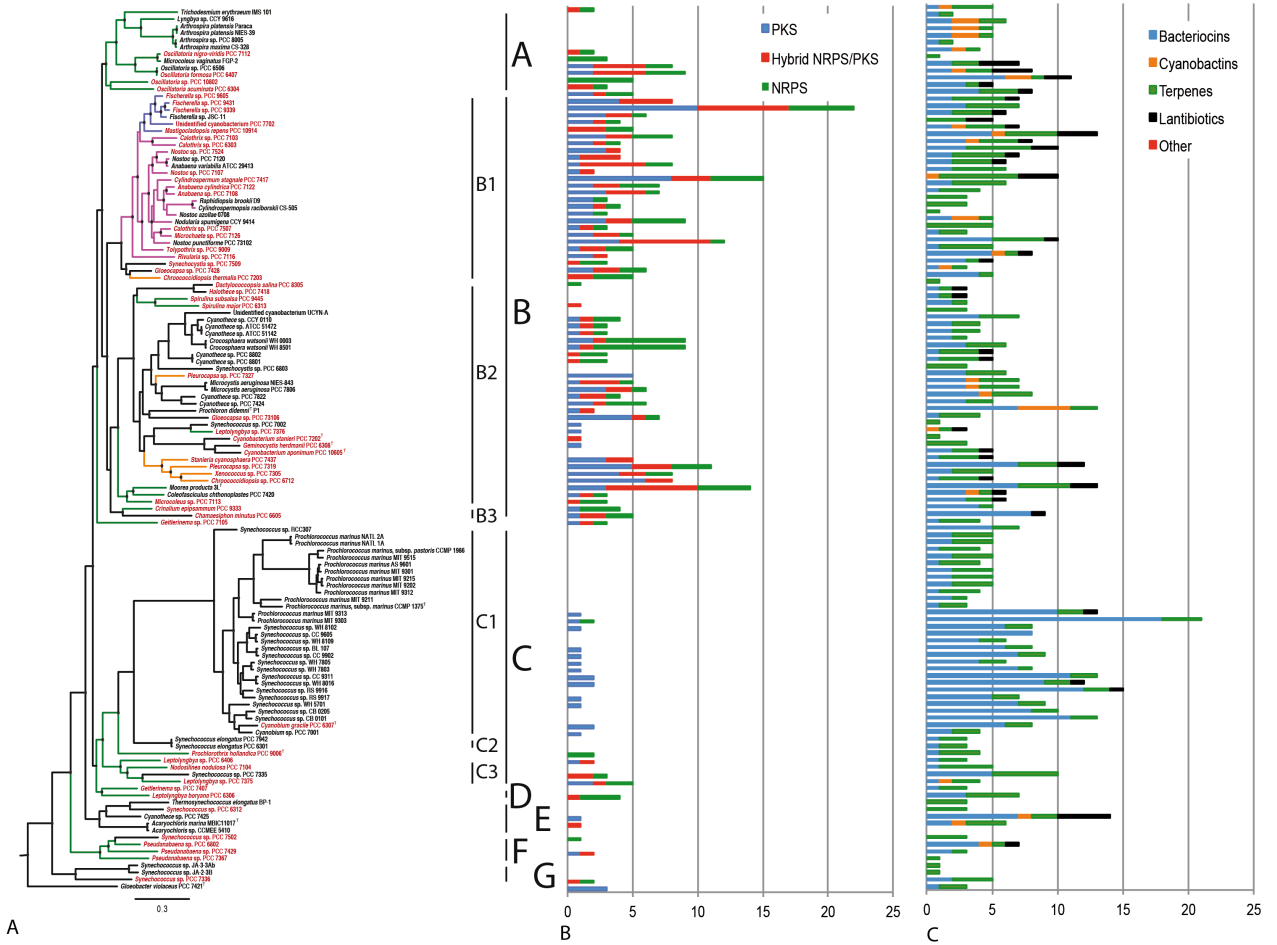

**Figure S9. | Distribution of the ribosome dependent and nonribosomal encoded peptide and polyketide biosynthetic pathways in Cyanobacteria.** A, Cyanobacterial Tree as in Fig. 1, B, Distribution of the nonribosomal peptide and polyketide gene clusters (number and occurrence within each genome), C, Distribution of the gene clusters involved in ribosome-dependent synthesis of diverse peptides (number and occurrence within each genome).



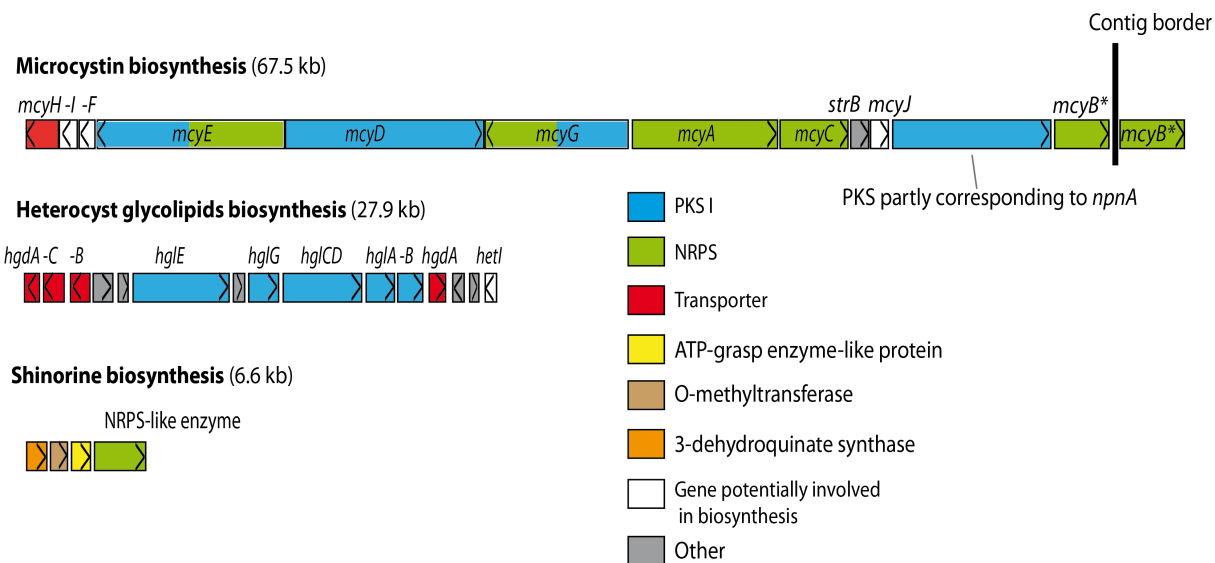

**Fig. S10. Predicted genetic potential for production of already known secondary metabolites found in the genome of *Fischerella* sp. PCC 9339.** The identities of the sequence are estimated at the amino-acid level (% AASI). The putative microcystin gene cluster has 79.8% AASI to the one of *Anabaena* sp. 90 (25) and 88.5% AASI to the partial one retrieved from *Hapalosiphon hibernicus* BZ-3-1(26). Note the additional PKS gene, which on 2/3 of its length with 77.5% AASI corresponds to *NpnA* gene of the nostophycin gene cluster in *Nostoc* sp. 152 (27). The putative heterocyst glycolipids gene cluster has 67% AASI to the gene cluster required for synthesis and deposition of envelope glycolipids in *Nostoc* sp. PCC 7120 (28). Note the presence of two *hgdA* and the combination of *hglC* and *hglD* into a single gene in the heterocyst producing *Fischerella* sp. PCC 9339. The putative shinorine gene cluster is 70% AASI to the one identified in *Anabaena variabilis* ATCC 29413 (29).

## Tables S1-S9

**Table S1. 126 Cyanobacteria included in this study**

Details on the strains are available in the Dataset S1.

<sup>T</sup> indicates Type strain or Type species, for genome status: F, finished, D, draft, P, permanent draft.

| Strain                         | Strain ID              | Genome size (Mb) | % mol GC | No of scaffolds (chromosome / plasmid) - status | NCBI Project ID | References |
|--------------------------------|------------------------|------------------|----------|-------------------------------------------------|-----------------|------------|
| <b>Subsection I</b>            |                        |                  |          |                                                 |                 |            |
| <i>Acaryochloris</i> sp.       | CCMEE 5410             | 7.88             | 47.1     | 511 - D                                         | 16707           | (30)       |
| <i>Acaryochloris marina</i>    | MBIC11017 <sup>T</sup> | 8.36             | 47       | 10 (1/9) - F                                    | 12997           | (31)       |
| <i>Chamaesiphon minutus</i>    | PCC 6605               | 6.76             | 45.7     | 3 - P                                           | 158825          | This study |
| <i>Crocospaera watsonii</i>    | WH 0003                | 5.89             | 37.7     | 1126 - D                                        | 61839           | (32)       |
| <i>Crocospaera watsonii</i>    | WH 8501                | 6.24             | 37.1     | 323 - D                                         | 10651           | (33)       |
| <i>Cyanobacterium aponinum</i> | PCC 10605 <sup>T</sup> | 4.18             | 34.9     | 2 - F                                           | 158691          | This study |
| <i>Cyanobacterium stanieri</i> | PCC 7202 <sup>T</sup>  | 3.16             | 38.7     | 1 - F                                           | 39697           | This study |
| <i>Cyanobium gracile</i>       | PCC 6307 <sup>T</sup>  | 3.34             | 68.7     | 1 - F                                           | 158695          | This study |
| <i>Cyanobium</i> sp.           | PCC 7001               | 2.83             | 68.7     | 2 - D                                           | 19301           |            |
| <i>Cyanothece</i> sp.          | ATCC 51142             | 5.46             | 37.9     | 6 (2/4) - F                                     | 20319           | (34)       |
| <i>Cyanothece</i> sp.          | ATCC 51472             | 5.46             | 37.9     | 7 - F                                           | 59973           | (35)       |
| <i>Cyanothece</i> sp.          | CCY 0110               | 5.88             | 36.7     | 163 - D                                         | 18951           |            |
| <i>Cyanothece</i> sp.          | PCC 7424               | 6.55             | 38.5     | 7 (1/6) - F                                     | 20479           | (35)       |
| <i>Cyanothece</i> sp.          | PCC 7425               | 5.79             | 50.7     | 4 (1/3) - F                                     | 28337           | (35)       |
| <i>Cyanothece</i> sp.          | PCC 7822               | 7.84             | 39.9     | 7 (1/6) - F                                     | 28535           | (35)       |
| <i>Cyanothece</i> sp.          | PCC 8801               | 4.79             | 39.8     | 4 (1/3) - F                                     | 20503           | (35)       |
| <i>Cyanothece</i> sp.          | PCC 8802               | 4.8              | 39.8     | 5 (1/4) - F                                     | 28339           | (35)       |
| <i>Dactylococcopsis salina</i> | PCC 8305               | 3.78             | 42.4     | 1 - F                                           | 158703          | This study |
| <i>Geminocystis herdmanii</i>  | PCC 6308 <sup>T</sup>  | 4.26             | 34.3     | 1 - P                                           | 62511           | This study |
| <i>Gloeobacter violaceus</i>   | PCC 7421 <sup>T</sup>  | 4.66             | 62       | 1 - F                                           | 9606            | (36)       |
| <i>Gloeocapsa</i> sp.          | PCC 73106              | 4.03             | 41.1     | 228 - D                                         | 159497          | This study |

|                                                         |                       |      |      |             |        |            |
|---------------------------------------------------------|-----------------------|------|------|-------------|--------|------------|
| <i>Gloeocapsa</i> sp.                                   | PCC 7428              | 5.88 | 43.4 | 5 - F       | 158831 | This study |
| <i>Halothece</i> sp.                                    | PCC 7418              | 4.18 | 42.9 | 1 - F       | 40817  | This study |
| <i>Microcystis aeruginosa</i>                           | NIES-843              | 5.84 | 42.3 | 1 - F       | 27835  | (37)       |
| <i>Microcystis aeruginosa</i>                           | PCC 7806              | 5.2  | 42   | 118 - D     | 15702  | (38)       |
| <i>Prochlorococcus marinus</i>                          | AS9601                | 1.67 | 31.3 | 1 - F       | 13548  | (39)       |
| <i>Prochlorococcus marinus</i>                          | MIT9202               | 1.69 | 31.1 | 1 - D       | 19343  |            |
| <i>Prochlorococcus marinus</i>                          | MIT9211               | 1.69 | 38   | 1 - F       | 13551  | (39)       |
| <i>Prochlorococcus marinus</i>                          | MIT9215               | 1.74 | 31.2 | 1 - F       | 18633  | (39)       |
| <i>Prochlorococcus marinus</i>                          | MIT9301               | 1.64 | 31.3 | 1 - F       | 15746  | (39)       |
| <i>Prochlorococcus marinus</i>                          | MIT9303               | 2.68 | 50   | 1 - F       | 13496  | (39)       |
| <i>Prochlorococcus marinus</i>                          | MIT9312               | 1.71 | 31.2 | 1 - F       | 13910  | (40)       |
| <i>Prochlorococcus marinus</i>                          | MIT9313               | 2.41 | 50.7 | 1 - F       | 220    | (41)       |
| <i>Prochlorococcus marinus</i>                          | MIT9515               | 1.7  | 31   | 1 - F       | 13617  | (39)       |
| <i>Prochlorococcus marinus</i>                          | NATL1A                | 1.86 | 35   | 1 - F       | 15660  | (39)       |
| <i>Prochlorococcus marinus</i>                          | NATL2A                | 1.84 | 35.1 | 1 - F       | 13911  | (39)       |
| <i>Prochlorococcus marinus</i> , subsp. <i>marinus</i>  | CCMP1375 <sup>T</sup> | 1.75 | 36.4 | 1 - F       | 419    | (42)       |
| <i>Prochlorococcus marinus</i> , subsp. <i>pastoris</i> | CCMP1986              | 1.66 | 30.8 | 1 - F       | 213    | (41)       |
| <i>Prochloron didemni</i> (metagenome)                  | P1                    | 6.2  | 42   | 100 - D     | 13452  | (43)       |
| <i>Synechococcus elongatus</i>                          | PCC 6301              | 2.7  | 55.5 | 1 - F       | 13282  | (44)       |
| <i>Synechococcus elongatus</i>                          | PCC 7942              | 2.74 | 55.4 | 2 (1/1) - F | 10645  |            |
| <i>Synechococcus</i> sp.                                | BL107                 | 2.28 | 54.2 | 6 - D       | 13559  | (45)       |
| <i>Synechococcus</i> sp.                                | CB0101                | 2.69 | 64.2 | 94 - D      | 46501  |            |
| <i>Synechococcus</i> sp.                                | CB0205                | 2.43 | 63   | 78 - D      | 46503  |            |
| <i>Synechococcus</i> sp.                                | CC9311                | 2.61 | 52.5 | 1 - F       | 12530  | (46)       |
| <i>Synechococcus</i> sp.                                | CC9605                | 2.51 | 59.2 | 1 - F       | 13643  | (45)       |
| <i>Synechococcus</i> sp.                                | CC9902                | 2.23 | 54.2 | 1 - F       | 13655  | (45)       |
| <i>Synechococcus</i> sp.                                | JA-2-3B               | 3.05 | 58.5 | 1 - F       | 16252  | (47)       |
| <i>Synechococcus</i> sp.                                | JA-3-3Ab              | 2.93 | 60.2 | 1 - F       | 16251  | (47)       |
| <i>Synechococcus</i> sp.                                | PCC 6312              | 3.72 | 48.5 | 2 - F       | 158717 | This study |

|                                        |          |      |      |             |        |            |
|----------------------------------------|----------|------|------|-------------|--------|------------|
| <i>Synechococcus</i> sp.               | PCC 7002 | 3.41 | 49.2 | 7 (1/6) - F | 28247  |            |
| <i>Synechococcus</i> sp.               | PCC 7335 | 5.97 | 48.2 | 11 - F      | 19377  |            |
| <i>Synechococcus</i> sp.               | PCC 7336 | 5.14 | 53.7 | 2 - F       | 158719 | This study |
| <i>Synechococcus</i> sp.               | PCC 7502 | 3.58 | 40.6 | 3 - F       | 159509 | This study |
| <i>Synechococcus</i> sp.               | RCC307   | 2.22 | 60.8 | 1 - F       | 13654  | (45)       |
| <i>Synechococcus</i> sp.               | RS9916   | 2.66 | 59.8 | 4 - D       | 13557  | (45)       |
| <i>Synechococcus</i> sp.               | RS9917   | 2.58 | 64.5 | 9 - D       | 13555  | (45)       |
| <i>Synechococcus</i> sp.               | WH 5701  | 3.04 | 65.4 | 135 - D     | 13554  | (45)       |
| <i>Synechococcus</i> sp.               | WH 7803  | 2.37 | 60.2 | 1 - F       | 13642  | (45)       |
| <i>Synechococcus</i> sp.               | WH 7805  | 2.62 | 57.6 | 13 - F      | 13553  | (45)       |
| <i>Synechococcus</i> sp.               | WH 8016  | 2.71 | 54.1 | 1 - F       | 61805  |            |
| <i>Synechococcus</i> sp.               | WH 8102  | 2.43 | 59.4 | 1 - F       | 230    | (48)       |
| <i>Synechococcus</i> sp.               | WH 8109  | 2.12 | 60.1 | 1 - F       | 37911  |            |
| <i>Synechocystis</i> sp.               | PCC 6803 | 3.95 | 47.4 | 5 (1/4) - F | 60     | (49)       |
| <i>Synechocystis</i> sp.               | PCC 7509 | 4.77 | 41.6 | 174 - D     | 159501 | This study |
| <i>Thermosynechococcus elongatus</i>   | BP-1     | 2.59 | 53.9 | 1 - F       | 308    | (50)       |
| Unidentified cyanobacterium (symbiont) | UCYN-A   | 1.44 | 31.1 | 1 - F       | 30917  | (51)       |
| <b>Subsection II</b>                   |          |      |      |             |        |            |
| <i>Chroococciopsis</i> sp.             | PCC 6712 | 5.7  | 35.3 | 3 - F       | 158687 | This study |
| <i>Chroococciopsis thermalis</i>       | PCC 7203 | 6.69 | 44.5 | 3 - F       | 38119  | This study |
| <i>Pleurocapsa</i> sp.                 | PCC 7319 | 7.39 | 38.7 | 10 - P      | 158813 | This study |
| <i>Pleurocapsa</i> sp.                 | PCC 7327 | 4.99 | 45.2 | 1 - F       | 158829 | This study |
| <i>Stanieria cyanosphaera</i>          | PCC 7437 | 5.55 | 36.2 | 6 - F       | 158877 | This study |
| <i>Xenococcus</i> sp.                  | PCC 7305 | 5.93 | 39.7 | 234 - D     | 159499 | This study |
| <b>Subsection III</b>                  |          |      |      |             |        |            |
| <i>Arthrospira maxima</i>              | CS-328   | 6    | 44.8 | 129 - D     | 29085  |            |
| <i>Arthrospira platensis</i>           | NIES-39  | 6.79 | 44.3 | 1 - F       | 42161  | (52)       |
| <i>Arthrospira platensis</i>           | Paraca   | 5.00 | 44.3 | 1820 - D    | 34793  |            |
| <i>Arthrospira</i> sp.                 | PCC 8005 | 6.15 | 44.7 | 119 - D     | 40633  | (53)       |

|                                       |                       |      |      |             |        |            |
|---------------------------------------|-----------------------|------|------|-------------|--------|------------|
| <i>Coleofasciculus chthonoplastes</i> | PCC 7420              | 8.68 | 45.4 | 57 - D      | 19325  |            |
| <i>Crinalium epipsammum</i>           | PCC 9333              | 5.62 | 40.2 | 9 - F       | 158835 | This study |
| <i>Geitlerinema</i> sp.               | PCC 7105              | 6.15 | 51.6 | 8 - P       | 158727 | This study |
| <i>Geitlerinema</i> sp.               | PCC 7407              | 4.68 | 58.5 | 1 - F       | 158833 | This study |
| <i>Leptolyngbya boryana</i>           | PCC 6306              | 7.26 | 47   | 5 - P       | 158729 | This study |
| <i>Leptolyngbya</i> sp.               | PCC 6406              | 5.61 | 55.2 | 377 - P     | 159511 | This study |
| <i>Leptolyngbya</i> sp.               | PCC 7375              | 9.42 | 47.6 | 5 - P       | 43137  | This study |
| <i>Leptolyngbya</i> sp.               | PCC 7376              | 5.13 | 43.9 | 1 - F       | 43487  | This study |
| <i>Lyngbya</i> sp.                    | CCY 9616              | 7.04 | 41.1 | 110 - D     | 13409  |            |
| <i>Microcoleus</i> sp.                | PCC 7113              | 7.97 | 46.2 | 9 - F       | 158839 | This study |
| <i>Microcoleus vaginatus</i>          | FGP-2                 | 6.7  | 46   | 40 - P      | 47601  | (54)       |
| <i>Moorea producta</i>                | 3L <sup>T</sup>       | 8.48 | 43.7 | 161 - D     | 60895  | (55)       |
| <i>Nodosilinea nodulosa</i>           | PCC 7104              | 6.89 | 57.7 | 2 - P       | 62311  | This study |
| <i>Oscillatoria acuminata</i>         | PCC 6304              | 7.8  | 47.6 | 3 - F       | 158709 | This study |
| <i>Oscillatoria formosa</i>           | PCC 6407              | 6.89 | 43.4 | 12 - P      | 158733 | This study |
| <i>Oscillatoria nigro-viridis</i>     | PCC 7112              | 8.27 | 45.8 | 6 - F       | 158711 | This study |
| <i>Oscillatoria</i> sp.               | PCC 10802             | 8.59 | 54.1 | 9 - P       | 158815 | This study |
| <i>Oscillatoria</i> sp.               | PCC 6506              | 6.68 | 43.4 | 377 - D     | 49445  | (56)       |
| <i>Prochlorothrix hollandica</i>      | PCC 9006 <sup>T</sup> | 5.65 | 54.4 | 13 - P      | 158811 | This study |
| <i>Pseudanabaena</i> sp.              | PCC 6802              | 5.62 | 47.8 | 6 - P       | 158731 | This study |
| <i>Pseudanabaena</i> sp.              | PCC 7367              | 4.89 | 46.2 | 2 - F       | 158713 | This study |
| <i>Pseudanabaena</i> sp.              | PCC 7429              | 5.48 | 43.2 | 464 - D     | 158837 | This study |
| <i>Spirulina major</i>                | PCC 6313              | 5.05 | 53.5 | 2 - F       | 158715 | This study |
| <i>Spirulina subsalsa</i>             | PCC 9445              | 5.32 | 47.4 | 2 - F       | 158827 | This study |
| <i>Trichodesmium erythraeum</i>       | IMS101                | 7.75 | 34.1 | 1 - F       | 318    |            |
| <b>Subsection IV</b>                  |                       |      |      |             |        |            |
| <i>Anabaena cylindrica</i>            | PCC 7122              | 7.06 | 38.8 | 7 - F       | 43355  | This study |
| <i>Anabaena</i> sp.                   | PCC 7108              | 5.89 | 38.8 | 3 - F       | 158737 | This study |
| <i>Anabaena variabilis</i>            | ATCC 29413            | 7.11 | 41.4 | 5 (2/3) - F | 10642  |            |
| <i>Calothrix</i> sp.                  | PCC 6303              | 6.96 | 39.8 | 4 - F       | 158041 | This study |

|                                       |           |       |      |             |        |            |
|---------------------------------------|-----------|-------|------|-------------|--------|------------|
| <i>Calothrix</i> sp.                  | PCC 7103  | 11.58 | 38.6 | 12 - P      | 159495 | This study |
| <i>Calothrix</i> sp.                  | PCC 7507  | 7.02  | 42.3 | 1 - F       | 158683 | This study |
| <i>Cylindrospermopsis raciborskii</i> | CS-505    | 3.88  | 40.2 | 93 - D      | 40109  | (57)       |
| <i>Cylindrospermum stagnale</i>       | PCC 7417  | 7.61  | 42.2 | 4 - P       | 158809 | This study |
| <i>Microchaete</i> sp.                | PCC 7126  | 5.74  | 42.2 | 3 - P       | 158817 | This study |
| <i>Nodularia spumigena</i>            | CCY 9414  | 5.32  | 41.3 | 204 - D     | 13447  |            |
| <i>Nostoc azollae</i> (endosymbiont)  | 708       | 5.49  | 38.4 | 3 (1/2) - F | 30807  | (58)       |
| <i>Nostoc punctiforme</i>             | PCC 73102 | 9.06  | 41.4 | 6 (1/5) - F | 216    |            |
| <i>Nostoc</i> sp.                     | PCC 7107  | 6.33  | 40.4 | 1 - F       | 158705 | This study |
| <i>Nostoc</i> sp.                     | PCC 7120  | 7.21  | 41.3 | 7 (1/6) - F | 244    | (59)       |
| <i>Nostoc</i> sp.                     | PCC 7524  | 6.72  | 41.5 | 3 - F       | 158707 | This study |
| <i>Raphidiopsis brookii</i>           | D9        | 3.19  | 40.1 | 47 - D      | 40111  | (57)       |
| <i>Rivularia</i> sp.                  | PCC 7116  | 8.73  | 37.5 | 3 - F       | 63147  | This study |
| <i>Tolypothrix</i> sp.                | PCC 9009  | 8.18  | 41.2 | 204 - D     | 63425  | This study |
| <b>Subsection V</b>                   |           |       |      |             |        |            |
| <i>Fischerella</i> sp.                | JSC-11    | 5.38  | 41.1 | 34 - D      | 61093  |            |
| <i>Fischerella</i> sp.                | PCC 9339  | 8.4   | 40.1 | 95 - P      | 159505 | This study |
| <i>Fischerella</i> sp.                | PCC 9431  | 7.14  | 40.2 | 36 - P      | 158821 | This study |
| <i>Fischerella</i> sp.                | PCC 9605  | 8.2   | 42.6 | 36 - P      | 158819 | This study |
| <i>Mastigocladopsis repens</i>        | PCC 10914 | 6.31  | 43.5 | 23 - P      | 158735 | This study |
| Unidentified cyanobacterium*          | PCC 7702  | 4.9   | 42.4 | 4 - P       | 158823 | This study |

\*PCC 7702 corresponds to the high temperature forms (HTF) of cyanobacteria found in hot springs, at temperatures higher than 50 °C (up to 62°C), and originally thought to be related to "*Mastigocladus laminosus*". The morphology of this HTF strain is variable from unicellular to very short filaments, and consequently, impossible to identify at the genus level. Furthermore, PCC 7702 strain is unable to fix nitrogen under aerobic conditions but contains *nif* genes.

**Table S2. Improvement of phylogenetic diversity with the addition of the CyanoGEBA dataset measured by Tree Imbalance**

**Phylogenetic Diversity Metric**

| CyanoGEBA set | Random set | Fold Improvement |
|---------------|------------|------------------|
| 10.82         | 5.28±0.37  | 1.92-2.20        |

**Tree Imbalance**

| Average Colless's Imbalance (n=1000) | Genomes prior to this study | All Genomes, including CyanoGEBA |
|--------------------------------------|-----------------------------|----------------------------------|
| Uniform Speciation                   | 0.093                       | 0.059                            |
| Equiprobable Speciation              | 0.30                        | 0.24                             |

**Table S3. Novel\* proteins in CyanoGEBA genomes**

\*lacking similarity to any protein in GenBank

| CyanoGEBA genome                           | Number of novel proteins coding genes | % of novel protein coding gene |
|--------------------------------------------|---------------------------------------|--------------------------------|
| <i>Anabaena cylindrica</i> PCC 7122        | 338                                   | 5.40                           |
| <i>Anabaena</i> sp. PCC 7108               | 291                                   | 5.57                           |
| <i>Calothrix</i> sp. PCC 6303              | 370                                   | 6.33                           |
| <i>Calothrix</i> sp. PCC 7103              | 1153                                  | 11.16                          |
| <i>Calothrix</i> sp. PCC 7507              | 375                                   | 6.00                           |
| <i>Chamaesiphon minutus</i> PCC 6605       | 704                                   | 10.94                          |
| <i>Chroococciopsis</i> sp. PCC 6712        | 334                                   | 6.45                           |
| <i>Chroococciopsis thermalis</i> PCC 7203  | 339                                   | 5.62                           |
| <i>Crinalium epipsammum</i> PCC 9333       | 372                                   | 7.35                           |
| <i>Cyanobacterium aponinum</i> PCC 10605   | 138                                   | 3.82                           |
| <i>Cyanobacterium stanieri</i> PCC 7202    | 97                                    | 3.30                           |
| <i>Cyanobium gracile</i> PCC 6307          | 212                                   | 6.16                           |
| <i>Cylindrospermum stagnale</i> PCC 7417   | 486                                   | 7.21                           |
| <i>Dactylococopsis salina</i> PCC 8305     | 199                                   | 5.40                           |
| <i>Fischerella</i> sp. PCC 9339            | 505                                   | 7.40                           |
| <i>Fischerella</i> sp. PCC 9431            | 360                                   | 5.90                           |
| <i>Fischerella</i> sp. PCC 9605            | 626                                   | 8.78                           |
| <i>Geitlerinema</i> sp. PCC 7105           | 412                                   | 7.63                           |
| <i>Geitlerinema</i> sp. PCC 7407           | 162                                   | 4.14                           |
| <i>Geminocystis herdmanii</i> PCC 6308     | 168                                   | 4.00                           |
| <i>Gloeocapsa</i> sp. PCC 73106            | 171                                   | 4.12                           |
| <i>Gloeocapsa</i> sp. PCC 7428             | 251                                   | 4.73                           |
| <i>Halothece</i> sp. PCC 7418              | 133                                   | 3.39                           |
| <i>Leptolyngbya boryana</i> PCC 6306       | 736                                   | 10.65                          |
| <i>Leptolyngbya</i> sp. PCC 6406           | 468                                   | 8.92                           |
| <i>Leptolyngbya</i> sp. PCC 7375           | 1137                                  | 13.46                          |
| <i>Leptolyngbya</i> sp. PCC 7376           | 342                                   | 7.35                           |
| <i>Mastigocladopsis repens</i> PCC 10914   | 409                                   | 7.17                           |
| <i>Microchaete</i> sp. PCC 7126            | 336                                   | 6.37                           |
| <i>Microcoleus</i> sp. PCC 7113            | 458                                   | 6.71                           |
| <i>Nodosilinea nodulosa</i> PCC 7104       | 480                                   | 7.42                           |
| <i>Nostoc</i> sp. PCC 7107                 | 220                                   | 3.97                           |
| <i>Nostoc</i> sp. PCC 7524                 | 253                                   | 4.45                           |
| <i>Oscillatoria acuminata</i> PCC 6304     | 419                                   | 6.87                           |
| <i>Oscillatoria formosa</i> PCC 6407       | 110                                   | 8.76                           |
| <i>Oscillatoria nigro-viridis</i> PCC 7112 | 508                                   | 13.37                          |
| <i>Oscillatoria</i> sp. PCC 10802          | 937                                   | 1.55                           |



|                                           |     |       |
|-------------------------------------------|-----|-------|
| <i>Pleurocapsa</i> sp. PCC 7319           | 452 | 6.70  |
| <i>Pleurocapsa</i> sp. PCC 7327           | 221 | 4.73  |
| <i>Prochlorothrix hollandica</i> PCC 9006 | 492 | 10.20 |
| <i>Pseudanabaena</i> sp. PCC 6802         | 525 | 9.64  |
| <i>Pseudanabaena</i> sp. PCC 7367         | 357 | 8.89  |
| <i>Pseudanabaena</i> sp. PCC 7429         | 406 | 8.42  |
| <i>Rivularia</i> sp. PCC 7116             | 437 | 6.29  |
| <i>Spirulina major</i> PCC 6313           | 247 | 5.54  |
| <i>Spirulina subsalsa</i> PCC 9445        | 216 | 4.67  |
| <i>Stanieria cyanosphaera</i> PCC 7437    | 255 | 5.06  |
| <i>Synechococcus</i> sp. PCC 6312         | 313 | 8.25  |
| <i>Synechococcus</i> sp. PCC 7336         | 472 | 9.90  |
| <i>Synechococcus</i> sp. PCC 7502         | 256 | 6.98  |
| <i>Synechocystis</i> sp. PCC 7509         | 247 | 5.19  |
| <i>Tolypothrix</i> sp. PCC 9009           | 636 | 8.53  |
| <i>Xenococcus</i> sp. PCC 7305            | 396 | 7.30  |
| Unidentified cyanobacterium PCC 7702      | 170 | 3.89  |

**Table S4. Prediction of CRISPR loci in CyanoGEBA genomes**

| CyanoGEBA genome                          | Number of spacer-direct repeat units | Number of CRISPR loci |
|-------------------------------------------|--------------------------------------|-----------------------|
| <i>Anabaena cylindrica</i> PCC 7122       | 367                                  | 13                    |
| <i>Anabaena</i> sp. PCC 7108              | 95                                   | 7                     |
| <i>Calothrix</i> sp. PCC 6303             | 72                                   | 6                     |
| <i>Calothrix</i> sp. PCC 7103             | 178                                  | 13                    |
| <i>Calothrix</i> sp. PCC 7507             | 336                                  | 10                    |
| <i>Chamaesiphon minutus</i> PCC 6605      | 59                                   | 3                     |
| <i>Chroococciopsis</i> sp. PCC 6712       | 47                                   | 5                     |
| <i>Chroococciopsis thermalis</i> PCC 7203 | 64                                   | 2                     |
| <i>Crinalium epipsammum</i> PCC 9333      | 113                                  | 6                     |
| <i>Cyanobacterium aponinum</i> PCC 10605  | 166                                  | 10                    |
| <i>Cyanobacterium stanieri</i> PCC 7202   | 15                                   | 2                     |
| <i>Cyanobium gracile</i> PCC 6307         | 0                                    | 0                     |
| <i>Cylindrospermum stagnale</i> PCC 7417  | 191                                  | 10                    |
| <i>Dactylococopsis salina</i> PCC 8305    | 0                                    | 0                     |
| <i>Fischerella</i> sp. PCC 9339           | 26                                   | 7                     |
| <i>Fischerella</i> sp. PCC 9431           | 18                                   | 4                     |
| <i>Fischerella</i> sp. PCC 9605           | 11                                   | 2                     |
| <i>Geitlerinema</i> sp. PCC 7105          | 650                                  | 15                    |
| <i>Geitlerinema</i> sp. PCC 7407          | 23                                   | 1                     |

|                                            |     |    |
|--------------------------------------------|-----|----|
| <i>Geminocystis herdmanii</i> PCC 6308     | 33  | 2  |
| <i>Gloeocapsa</i> sp. PCC 73106 *          | 50  | 4  |
| <i>Gloeocapsa</i> sp. PCC 7428             | 98  | 3  |
| <i>Halotheca</i> sp. PCC 7418              | 443 | 4  |
| <i>Leptolyngbya boryana</i> PCC 6306       | 80  | 5  |
| <i>Leptolyngbya</i> sp. PCC 6406 *         | 168 | 9  |
| <i>Leptolyngbya</i> sp. PCC 7375           | 188 | 12 |
| <i>Leptolyngbya</i> sp. PCC 7376           | 6   | 1  |
| <i>Mastigocladopsis repens</i> PCC 10914   | 0   | 0  |
| <i>Microchaete</i> sp. PCC 7126            | 88  | 4  |
| <i>Microcoleus</i> sp. PCC 7113            | 72  | 10 |
| <i>Nodosilinea nodulosa</i> PCC 7104       | 75  | 4  |
| <i>Nostoc</i> sp. PCC 7107                 | 252 | 14 |
| <i>Nostoc</i> sp. PCC 7524                 | 278 | 6  |
| <i>Oscillatoria acuminata</i> PCC 6304     | 279 | 10 |
| <i>Oscillatoria formosa</i> PCC 6407       | 95  | 10 |
| <i>Oscillatoria nigro-viridis</i> PCC 7112 | 304 | 9  |
| <i>Oscillatoria</i> sp. PCC 10802          | 531 | 18 |
| <i>Pleurocapsa</i> sp. PCC 7319            | 68  | 1  |
| <i>Pleurocapsa</i> sp. PCC 7327            | 100 | 4  |
| <i>Prochlorothrix hollandica</i> PCC 9006  | 237 | 8  |
| <i>Pseudanabaena</i> sp. PCC 6802          | 77  | 2  |
| <i>Pseudanabaena</i> sp. PCC 7367          | 160 | 7  |
| <i>Pseudanabaena</i> sp. PCC 7429 *        | 610 | 14 |
| <i>Rivularia</i> sp. PCC 7116              | 256 | 15 |
| <i>Spirulina major</i> PCC 6313            | 102 | 7  |
| <i>Spirulina subsalsa</i> PCC 9445         | 625 | 17 |
| <i>Stanieria cyanosphaera</i> PCC 7437     | 74  | 4  |
| <i>Synechococcus</i> sp. PCC 6312          | 154 | 4  |
| <i>Synechococcus</i> sp. PCC 7336          | 285 | 8  |
| <i>Synechococcus</i> sp. PCC 7502          | 62  | 2  |
| <i>Synechocystis</i> sp. PCC 7509 *        | 6   | 1  |
| <i>Tolypothrix</i> sp. PCC 9009 *          | 201 | 15 |
| <i>Xenococcus</i> sp. PCC 7305 *           | 37  | 5  |
| Unidentified cyanobacterium PCC 7702       | 8   | 2  |

\* These genomes are not finished and currently contain more than 100 scaffolds. The number of spacer-direct repeat units and CRISPR loci therefore may be underestimated.

**Table S5. Comparative genomics of morphological transitions**

Events of morphological transition are shown in Fig. 1. For each event, the set of genes involved in one genome or in genomes belonging to one subsection (genome in) were compared those of genomes of another subsection (genome out). Genomes are annotated by the Strain ID as in Table S1.

| <b>Morphological transition<br/>(Genomes in vs out)</b>                                          | <b>Evolutionary transition<br/>(Subsection to<br/>Subsection)</b> | <b>Number<br/>of genes</b> |
|--------------------------------------------------------------------------------------------------|-------------------------------------------------------------------|----------------------------|
| Event 1<br>(PCC 7367, PCC 7429, PCC 6802 vs PCC 7502)                                            | III to I                                                          | 88                         |
| Event 2<br>(PCC 6406, PCC 7104, PCC 7375 vs PCC 7335)                                            | III to I                                                          | 674                        |
| Event 3<br>(PCC 9006, PCC 6406, PCC 7104, PCC 7375, PCC 6306,<br>PCC 7407 vs subclade C1 and C2) | III to I                                                          | 32                         |
| Event 4<br>(PCC 7002, PCC 7202, PCC 6308, and PCC 10605<br>vs PCC 7376)                          | I to III                                                          | 3172                       |
| Event 5<br>(NIES-843, PCC 7806, PCC 7822, and PCC 7424<br>vs PCC 7327)                           | I to II                                                           | 2531                       |
| Event 6<br>(PCC 7428, PCC 7509 vs PCC 7203)                                                      | I to II                                                           | 3783                       |
| Event 7<br>(PCC 7203, PCC 7428, PCC 7509 vs Subsection IV and V)                                 | I to IV and V                                                     | 9                          |
| Event 8<br>(Subsection V vs Subsection IV)                                                       | IV to V                                                           | 0                          |

**Table S6. Homologous proteins lost during the reversion of filamentous to unicellular morphology in both Event 2 and Event 3.**

| Query locus tag<br>in Event 2 | Top hit locus tag<br>in Event 3 | Query annotation                                                                                    |
|-------------------------------|---------------------------------|-----------------------------------------------------------------------------------------------------|
| Pro9006DRAFT_1077             | Lepto6406DRAFT_00007290         | Arsenite-activated ATPase ArsA                                                                      |
| Pro9006DRAFT_3818             | Lepto6406DRAFT_00024510         | HAS barrel domain.                                                                                  |
| Pro9006DRAFT_3344             | Lepto6406DRAFT_00009900         | Hypothetical protein                                                                                |
| Pro9006DRAFT_0305             | Lepto6406DRAFT_00035530         | Hypothetical protein                                                                                |
| Pro9006DRAFT_0620             | Lepto6406DRAFT_00010140         | Hypothetical protein                                                                                |
| Pro9006DRAFT_4432             | Lepto6406DRAFT_00049190         | Highly conserved protein containing a thioredoxin domain                                            |
| Pro9006DRAFT_1144             | Lepto6406DRAFT_00002010         | Asparaginase                                                                                        |
| Pro9006DRAFT_2144             | Lepto6406DRAFT_00041660         | Response regulators consisting of a CheY-like receiver domain and a winged-helix DNA-binding domain |
| Pro9006DRAFT_3622             | Lepto6406DRAFT_00019670         | Iron-sulfur cluster binding protein, putative                                                       |
| Pro9006DRAFT_0863             | Lepto6406DRAFT_00033060         | Hypothetical protein                                                                                |
| Pro9006DRAFT_2707             | Lepto6406DRAFT_00005310         | Hypothetical protein                                                                                |
| Pro9006DRAFT_1113             | Lepto6406DRAFT_00025920         | Hypothetical protein                                                                                |
| Pro9006DRAFT_0892             | Lepto6406DRAFT_00019960         | Hypothetical protein                                                                                |
| Pro9006DRAFT_0326             | Lepto6406DRAFT_00025500         | Hypothetical protein                                                                                |
| Pro9006DRAFT_4045             | Lepto6406DRAFT_00040530         | Alpha-amylase/alpha-mannosidase                                                                     |
| Pro9006DRAFT_1882             | Lepto6406DRAFT_00043930         | Hypothetical protein                                                                                |
| Pro9006DRAFT_4594             | Lepto6406DRAFT_00035370         | Hypothetical protein                                                                                |
| Pro9006DRAFT_1996             | Lepto6406DRAFT_00016810         | Hypothetical protein                                                                                |
| Pro9006DRAFT_1710             | Lepto6406DRAFT_00003520         | Hypothetical protein                                                                                |
| Pro9006DRAFT_2550             | Lepto6406DRAFT_00031350         | Polyketide cyclase / dehydrase and lipid transport.                                                 |
| Pro9006DRAFT_2845             | Lepto6406DRAFT_00014640         | Hypothetical protein                                                                                |
| Pro9006DRAFT_0040             | Lepto6406DRAFT_00005410         | Hypothetical protein                                                                                |
| Pro9006DRAFT_1334             | Lepto6406DRAFT_00025630         | Hypothetical protein                                                                                |
| Pro9006DRAFT_1711             | Lepto6406DRAFT_00003510         | Hypothetical protein                                                                                |
| Pro9006DRAFT_1895             | Lepto6406DRAFT_00032390         | Hypothetical protein                                                                                |
| Pro9006DRAFT_2407             | Lepto6406DRAFT_00028690         | FOG: GAF domain                                                                                     |
| Pro9006DRAFT_4751             | Lepto6406DRAFT_00041610         | Hypothetical protein                                                                                |
| Pro9006DRAFT_1359             | Lepto6406DRAFT_00013970         | Uncharacterized conserved protein                                                                   |
| Pro9006DRAFT_1554             | Lepto6406DRAFT_00014960         | Uncharacterized protein conserved in bacteria                                                       |

**Table S7. Increase in number of cyanobacterial proteins improves prediction of eukaryotic nuclear genes that resulted from Endosymbiotic Gene Transfer.**

| <b>Eukaryote</b>                   | <b>Number of genes predicted without CyanoGEBA genomes</b> | <b>Number of genes predicted including CyanoGEBA genomes</b> | <b>% increase with CyanoGEBA</b> |
|------------------------------------|------------------------------------------------------------|--------------------------------------------------------------|----------------------------------|
| <i>Arabidopsis</i> (plant)         | 3811                                                       | 4339                                                         | 14%                              |
| <i>Physcomitrella</i> (plant)      | 2941                                                       | 3300                                                         | 12%                              |
| <i>Micromonas</i> (green algae)    | 1472                                                       | 1643                                                         | 12%                              |
| <i>Cyanidioschyzon</i> (red algae) | 711                                                        | 777                                                          | 9%                               |
| <i>Ectocarpus</i> (brown algae)    | 1891                                                       | 2156                                                         | 14%                              |
| <i>Emiliana</i> (haptophyte)       | 4397                                                       | 5151                                                         | 17%                              |
| <i>Phaeodactylum</i> (diatom)      | 1425                                                       | 1610                                                         | 13%                              |
| <i>Thalassiosira</i> (diatom)      | 1436                                                       | 1637                                                         | 14%                              |
| <i>Cyanophora</i> (glaucohyte)     | 2417                                                       | 2739                                                         | 13%                              |
| <b>Average</b>                     |                                                            |                                                              | <b>13%</b>                       |

**Table S8. COG functional category distribution of nuclear genes that are of cyanobacterial descent**

Functional category of Cluster of Orthologous Group (COG) from cyanobacterial genomes retrieved in the nuclear genomes of diverse photosynthetic eukaryotes. The latter are indicated as followed: 1, *Arabidopsis*; 2, *Physcomitrella*; 3, *Micromonas*; 4, *Cyanidioschyzon*; 5, *Ectocarpus*; 6, *Emiliana*; 7, *Thalassiosira*; 8, *Phaeodactylum*; 9, *Cyanophora*

| COG                                                           | 1   | 2   | 3   | 4   | 5   | 6   | 7   | 8   | 9   |
|---------------------------------------------------------------|-----|-----|-----|-----|-----|-----|-----|-----|-----|
| RNA processing and modification                               | 0%  | 0%  | 0%  | 0%  | 0%  | 0%  | 0%  | 0%  | 0%  |
| Chromatin structure and dynamics                              | 0%  | 0%  | 0%  | 0%  | 0%  | 0%  | 0%  | 0%  | 0%  |
| Energy production and conversion                              | 4%  | 7%  | 5%  | 5%  | 4%  | 4%  | 5%  | 5%  | 4%  |
| Cell cycle control, cell division, chromosome partitioning    | 0%  | 1%  | 1%  | 1%  | 1%  | 1%  | 0%  | 1%  | 1%  |
| Amino acid transport and metabolism                           | 5%  | 6%  | 6%  | 9%  | 4%  | 4%  | 6%  | 7%  | 5%  |
| Nucleotide transport and metabolism                           | 1%  | 1%  | 1%  | 2%  | 1%  | 2%  | 1%  | 1%  | 1%  |
| Carbohydrate transport and metabolism                         | 7%  | 9%  | 7%  | 7%  | 5%  | 6%  | 6%  | 6%  | 5%  |
| Coenzyme transport and metabolism                             | 3%  | 4%  | 6%  | 7%  | 4%  | 4%  | 5%  | 5%  | 4%  |
| Lipid transport and metabolism                                | 8%  | 5%  | 3%  | 4%  | 3%  | 4%  | 4%  | 4%  | 2%  |
| Translation, ribosomal structure and biogenesis               | 4%  | 5%  | 6%  | 7%  | 3%  | 4%  | 5%  | 5%  | 3%  |
| Transcription                                                 | 2%  | 3%  | 2%  | 2%  | 3%  | 2%  | 2%  | 2%  | 3%  |
| Replication, recombination and repair                         | 2%  | 2%  | 3%  | 5%  | 3%  | 4%  | 3%  | 3%  | 5%  |
| Cell wall/membrane/ envelope biogenesis                       | 6%  | 6%  | 5%  | 6%  | 4%  | 4%  | 4%  | 5%  | 3%  |
| Cell motility                                                 | 1%  | 0%  | 1%  | 0%  | 3%  | 1%  | 1%  | 1%  | 1%  |
| Posttranslational modification, protein turnover, chaperones  | 7%  | 7%  | 9%  | 8%  | 8%  | 7%  | 9%  | 8%  | 6%  |
| Inorganic ion transport and metabolism                        | 4%  | 4%  | 4%  | 5%  | 4%  | 6%  | 4%  | 5%  | 4%  |
| Secondary metabolites biosynthesis, transport and catabolism  | 6%  | 4%  | 5%  | 3%  | 4%  | 7%  | 4%  | 5%  | 3%  |
| General function prediction only                              | 21% | 18% | 20% | 16% | 25% | 19% | 23% | 19% | 23% |
| Function unknown                                              | 12% | 11% | 12% | 9%  | 13% | 13% | 11% | 11% | 10% |
| Signal transduction mechanisms                                | 4%  | 4%  | 3%  | 2%  | 5%  | 3%  | 4%  | 4%  | 14% |
| Intracellular trafficking, secretion, and vesicular transport | 2%  | 2%  | 2%  | 2%  | 4%  | 2%  | 2%  | 2%  | 2%  |
| Defense mechanisms                                            | 0%  | 0%  | 0%  | 0%  | 0%  | 1%  | 0%  | 0%  | 1%  |
| Extracellular structures                                      | 0%  | 0%  | 0%  | 0%  | 0%  | 0%  | 0%  | 0%  | 0%  |
| Cytoskeleton                                                  | 0%  | 0%  | 0%  | 0%  | 0%  | 0%  | 0%  | 0%  | 0%  |

**Table S9. Sequencing information of CyanoGEBA organisms**

The finishing efforts are indicated as followed: MF, manual finishing; AF, autofinishing. Submit indicates that the genome sequence has been submitted to NCBI to obtain the BioProject number.

| CyanoGEBA Organism                           | 454 Libraries                                                         | 454 Total Reads | 454 Total Mb | Illumina Libraries | Illumina Total Reads | Illumina Total bp | Finishing efforts | Nb of contigs / scaffolds | IMG Taxon ID |
|----------------------------------------------|-----------------------------------------------------------------------|-----------------|--------------|--------------------|----------------------|-------------------|-------------------|---------------------------|--------------|
| <i>Anabaena cylindrica</i><br>PCC 7122       | (1) 454 STD TIT,<br>(3) 454 PE<br>(9138 kb,<br>3178 kb,<br>NA)        | 1,079,579       | 361.9        | (1) ILL<br>STD     | 180,472,451          | 6,497,008,236     | MF                | 7 / 7                     | 2503982047   |
| <i>Anabaena</i> sp.<br>PCC 7108              | (1) 454 STD TIT,<br>(2) 454 PE<br>(11344kb,<br>4036 kb)               | 727,027         | 181.2        | (1) ILL<br>STD     | 60,554,068           | 4,602,109,168     | AF                | 13 / 3                    | 2506485002   |
| <i>Calothrix</i> sp.<br>PCC 6303             | (1) 454 STD TIT,<br>(2) 454 PE<br>(9829 kb,<br>4087.8 kb)             | 1,303,031       | 461.6        | (1) ILL<br>STD     | 115,161,558          | 8,752,278,408     | MF                | 4 / 4                     | 2503982036   |
| <i>Calothrix</i> sp.<br>PCC 7103             | (0) 454 STD TIT,<br>(2) 454 PE<br>(5331 kb,<br>6844 kb)               | 640,339         | 216.1        | (1) ILL<br>STD     | 37,899,348           | 2,880,350,448     | AF                | 67 / 12                   | 2507262048   |
| <i>Calothrix</i> sp.<br>PCC 7507             | (1) 454 STD TIT,<br>(2) 454 PE<br>(5438 kb,<br>2730 kb)               | 672,159         | 258.3        | (1) ILL<br>STD     | 42,042,292           | 3,195,214,192     | MF                | 1 / 1                     | 2505679032   |
| <i>Chamaesiphon minutus</i><br>PCC 6605      | (1) 454 STD TIT,<br>(1) 454 PE<br>(6916 kb)                           | 976,084         | 247.3        | (1) ILL<br>STD     | 60,314,630           | 4,583,911,880     | MF                | 3 / 3                     | 2510436000   |
| <i>Chroococciopsis</i> sp.<br>PCC 6712       | (1) 454 STD TIT,<br>(3) 454 PE<br>(2604 kb,<br>12,305 kb,<br>2694 kb) | 1,269,117       | 353.5        | (1) ILL<br>STD     | 36,438,868           | 1,311,799,248     | AF                | 18 / 3                    | 2505679029   |
| <i>Chroococciopsis thermalis</i><br>PCC 7203 | (1) 454 STD TIT,<br>(1) 454 PE<br>(8583 kb)                           | 788,934         | 272.3        | (3) ILL<br>STD     | 32,800,000           | 1,180,704,000     | MF                | 3 / 3                     | 2503538021   |
| <i>Crinalium epipsammum</i><br>PCC 9333      | (1) 454 STD TIT,<br>(1) 454 PE<br>(8063)                              | 230,731         | 128.8        | (1) ILL<br>STD     | 30,965,529           | 1,114,759,044     | MF                | 9 / 9                     | 2504643013   |
| <i>Cyanobacterium aponinum</i><br>PCC 10605  | (2) 454 STD TIT,<br>(2) 454 PE<br>(NA, NA)                            | 519,034         | 145          | (1) ILL<br>STD     | 43,225,758           | 3,285,157,608     | MF                | 2 / 2                     | 2503707009   |
| <i>Cyanobacterium stanieri</i><br>PCC 7202   | (1) 454 STD TIT,<br>(1) 454 PE<br>(8540 kb)                           | 754,375         | 252.4        | (1) ILL<br>STD     | 2,050,270            | 366,482,655       | MF                | 1 / 1                     | 2503283023   |
| <i>Cyanobium gracile</i><br>PCC 6307         | (1) 454 STD TIT,<br>(1) 454 PE<br>(7784 kb)                           | 356,894         | 159          | (1) ILL<br>STD     | 66,080,366           | 5,022,107,816     | MF                | 1 / 1                     | 2508501011   |

|                                             |                                                                 |           |       |                                            |             |                |      |           |            |
|---------------------------------------------|-----------------------------------------------------------------|-----------|-------|--------------------------------------------|-------------|----------------|------|-----------|------------|
| <i>Cylindrospermum stagnale</i><br>PCC 7417 | (1) 454 STD TIT,<br>(2) 454 PE<br>(6956 kb,<br>4374 kb)         | 1,662,064 | 379.2 | (1) ILL<br>STD                             | 74,952,294  | 5,696,374,344  | AF   | 10 / 4    | 2509601025 |
| <i>Dactylococcopsis salina</i><br>PCC 8305  | (1) 454 STD TIT,<br>(1) 454 PE<br>(7217 kb)                     | 976,293   | 246.7 | (1) ILL<br>STD                             | 29,937,544  | 1,077,751,584  | MF   | 1 / 1     | 2509276056 |
| <i>Fischerella</i> sp.<br>PCC 9339          | -                                                               | -         | -     | (1) ILL<br>STD, (1)<br>ILL PE              | 31,117,314  | 4,667,600,000  | none | 171 / 95  | 2516653082 |
| <i>Fischerella</i> sp.<br>PCC 9431          | -                                                               | -         | -     | (1) ILL<br>STD, (1)<br>ILL PE<br>(6617 kb) | 560,072,428 | 81,357,230     | none | 201 / 36  | 2512875027 |
| <i>Fischerella</i> sp.<br>PCC 9605          | -                                                               | -         | -     | (1) ILL<br>STD, (1)<br>ILL PE<br>(2209 kb) | 45,267,538  | 6,790,130,000  | none | 49 / 36   | 2516143000 |
| <i>Geitlerinema</i> sp.<br>PCC 7105         | (1) 454 STD TIT,<br>(2) 454 PE<br>(10539 kb,<br>4458 kb)        | 1,285,347 | 304.2 | (1) ILL<br>STD                             | 116,062,307 | 7,311,925,341  | AF   | 288 / 8   | 2510065011 |
| <i>Geitlerinema</i> sp.<br>PCC 7407         | (1) 454 STD TIT,<br>(1) 454 PE<br>(4018 kb)                     | 292,666   | 167.4 | (1) ILL<br>STD                             | 37,618,333  | 2,858,993,308  | MF   | 1 / 1     | 2503538020 |
| <i>Geminocystis herdmanii</i><br>PCC 6308   | -                                                               | -         | -     | (1) ILL<br>STD                             | 64,203,930  | 4,882,710,000  | AF   | 11 / 1    | 2509601046 |
| <i>Gloeocapsa</i> sp.<br>PCC 73106          | (1) 454 STD TIT,<br>(2) 454 PE<br>/ (8550 kb<br>and 7666<br>kb) | 481,442   | 297.2 | (1) ILL<br>STD                             | 62,560,585  | 4,754,604,460  | none | 228 / 228 | 2508501033 |
| <i>Gloeocapsa</i> sp.<br>PCC 7428           | (1) 454 STD TIT,<br>(1) 454 PE/<br>(9786 kb)                    | 129,654   | 226.5 | (1) ILL<br>STD                             | 31,204,529  | 576,136,120    | MF   | 5 / 5     | 2503754017 |
| <i>Halothece</i> sp.<br>PCC 7418            | (0) 454 STD TIT,<br>(2) 454 PE<br>(2627 kb,<br>9799 kb)         | 902,827   | 216.1 | (1) ILL<br>STD                             | 257,227,056 | 19,549,256,256 | MF   | 1 / 1     | 2503538028 |
| <i>Leptolyngbya boryana</i><br>PCC 6306     | -                                                               | -         | -     | (1) ILL<br>STD                             | 9,298,704   | 6,649,250,000  | AF   | 11 / 5    | 2509601031 |
| <i>Leptolyngbya</i> sp.<br>PCC 6406         | (1) 454 STD TIT,<br>(2) 454 PE<br>(8212 kb)                     | 1,049,271 | 273.4 | (1) ILL<br>STD                             | 86,532,372  | 6,576,460,272  | none | 377 / 377 | 2517572073 |
| <i>Leptolyngbya</i> sp.<br>PCC 7375         | (1) 454 STD TIT,<br>(1) 454 PE/<br>(12811 kb)                   | 228,442   | 170   | (1) ILL<br>STD                             | 22,675,741  | 816,326,676    | AF   | 40 / 5    | 2509601039 |
| <i>Leptolyngbya</i> sp.<br>PCC 7376         | -                                                               | -         | -     | (1) ILL<br>STD, (1)<br>ILL PE<br>(2481 kb) | 529,092,128 | 79,363,820,000 | MF   | 1 / 1     | 2503754048 |
| <i>Mastigocladopsis repens</i><br>PCC 10914 | (1) 454 STD TIT,<br>(2) 454 PE<br>(9610 kb,<br>3964 kb)         | 1,444,337 | 316.7 | (1) ILL<br>STD                             | 25,286,224  | 910,304,064    | none | 325 / 23  | 2517093042 |



|                                               |                                                                       |           |       |             |             |                |    |           |            |
|-----------------------------------------------|-----------------------------------------------------------------------|-----------|-------|-------------|-------------|----------------|----|-----------|------------|
| <i>Microchaete</i> sp.<br>PCC 7126            | (1) 454 PE/<br>(117346 kb)                                            | 735,764   | 109.6 | (1) ILL STD | 69,022,092  | 5,245,678,992  | AF | 5 / 3     | 2509601027 |
| <i>Microcoleus</i> sp.<br>PCC 7113            | (2) 454 STD TIT,<br>(3) 454 PE (4283 kb, 7800 kb, NA)                 | 626,176   | 201.3 | (1) ILL STD | 57,251,139  | 4,351,086,564  | MF | 9 / 9     | 2509276031 |
| <i>Nodosilinea nodulosa</i> .<br>PCC 7104     | (1) 454 STD TIT,<br>(4) 454 PE (2798 kb, 24356kb, 22893 kb, 11125 kb) | 1,921,672 | 486.1 | (1) ILL STD | 25,897,163  | 932,297,868    | AF | 62 / 2    | 2509601026 |
| <i>Nostoc</i> sp.<br>PCC 7107                 | (1) 454 STD TIT, (2) 454 PE (1695 kb, 4068 kb)                        | 2,132,299 | 546.3 | (1) ILL STD | 62,447,094  | 4,745,979,144  | MF | 1 / 1     | 2503707008 |
| <i>Nostoc</i> sp.<br>PCC 7524                 | (1) 454 STD TIT,<br>(2) 454 PE (11786 kb, 11762 kb)                   | 681,222   | 256.3 | (1) ILL STD | 17,798,114  | 640,732,104    | MF | 3 / 3     | 2509601032 |
| <i>Oscillatoria acuminata</i><br>PCC 6304     | (0) 454 STD TIT,<br>(1) 454 PE (8203 kb)                              | 652,065   | 129.4 | (1) ILL STD | 67,180,232  | 5,105,697,632  | MF | 3 / 3     | 2509276028 |
| <i>Oscillatoria formosa</i><br>PCC 6407       | (1) 454 STD TIT,<br>(2) 454 PE                                        | 1,050,403 | 253.9 | (1) ILL STD | 25,052,472  | 901,888,992    | AF | 259 / 12  | 2508501075 |
| <i>Oscillatoria nigro-viridis</i><br>PCC 7112 | (1) 454 STD TIT,<br>(2) 454 PE (8172 kb, 6631 kb)                     | 1,446,977 | 433.8 | (1) ILL STD | 46,329,519  | 3,521,043,444  | AF | 108 / 6   | 2503982035 |
| <i>Oscillatoria</i> sp.<br>PCC 10802          | (1) 454 STD TIT,<br>(2) 454 PE                                        | 499,658   | 244.6 | (1) ILL STD | 70,039,722  | 5,323,018,872  | MF | 6 / 9     | 2509276047 |
| <i>Pleurocapsa</i> sp.<br>PCC 7319            | (1) 454 STD TIT,<br>(1) 454 PE (12243 kb)                             | 1,020,605 | 299.4 | (1) ILL STD | 31,122,538  | 2,365,312,888  | AF | 30 / 10   | 2509601013 |
| <i>Pleurocapsa</i> sp.<br>PCC 7327            | (1) 454 STD TIT,<br>(2) 454 PE (1525 kb, 7351 kb)                     | 1,361,678 | 352.7 | (1) ILL STD | 145,035,126 | 11,022,669,576 | MF | 1 / 1     | 2509276061 |
| <i>Prochlorothrix hollandica</i><br>PCC 9006  | (1) 454 STD TIT,<br>(2) 454 PE (5749 kb, 8122 kb)                     | 830,913   | 198.7 | (1) ILL STD | 112,562,730 | 8,554,767,480  | AF | 233 / 13  | 2509276045 |
| <i>Pseudanabaena</i> sp.<br>PCC 6802          | (1) 454 STD TIT,<br>(2) 454 PE (4119 kb, 12050 kb)                    | 1,300,658 | 271.9 | (1) ILL STD | 31,942,889  | 1,149,944,004  | AF | 28 / 6    | 2506783054 |
| <i>Pseudanabaena</i> sp.<br>PCC 7367          | (0) 454 STD TIT,<br>(1) 454 PE (10442 kb)                             | 396,482   | 75.9  | (1) ILL STD | 82,635,242  | 6,280,278,392  | MF | 2 / 2     | 2504643012 |
| <i>Pseudanabaena</i> sp.<br>PCC 7429          | (1) 454 STD TIT,<br>(2) 454 PE (9299 kb, 3092 kb)                     | 613,351   | 198.8 | (1) ILL STD | 83,683,990  | 6,359,983,240  | AF | 517 / 464 | 2504557005 |

|                                               |                                                                          |           |       |                               |            |               |      |           |            |
|-----------------------------------------------|--------------------------------------------------------------------------|-----------|-------|-------------------------------|------------|---------------|------|-----------|------------|
| <i>Rivularia</i> sp.<br>PCC 7116              | (1) 454<br>STD TIT,<br>(3) 454 PE<br>(3104 kb,<br>22486 kb,<br>22469 kb) | 1,240,665 | 224   | (1) ILL<br>STD                | 47,209,745 | 1,699,550,820 | MF   | 3 / 3     | 2510065008 |
| <i>Spirulina major</i><br>PCC 6313            | (1) 454<br>STD TIT,<br>(1) 454 PE<br>(5378 kb)                           | 487,235   | 257.8 | (1) ILL<br>STD                | 87,627,634 | 6,659,700,184 | AF   | 10 / 2    | 2506520014 |
| <i>Spirulina subsalsa</i><br>PCC 9445         | (1) 454<br>STD TIT,<br>(1) 454 PE<br>(13930 kb)                          | 404,680   | 198   | (1) ILL<br>STD                | 61,669,554 | 4,686,886,104 | AF   | 10 / 2    | 2506520011 |
| <i>Stanieria<br/>cyanosphaera</i><br>PCC 7437 | (0) 454<br>STD TIT,<br>(1) 454 PE<br>(7497 kb)                           | 378,359   | 74.8  | (1) ILL<br>STD                | 86,083,820 | 6,542,370,320 | MF   | 6 / 6     | 2503754019 |
| <i>Synechococcus</i><br>sp.<br>PCC 6312       | (1) 454<br>STD TIT,<br>(1) 454 PE<br>(4402 kb)                           | 823,816   | 251.4 | (1) ILL<br>STD                | 72,440,844 | 5,505,504,144 | MF   | 2 / 2     | 2509276030 |
| <i>Synechococcus</i><br>sp.<br>PCC 7336       | (1) 454<br>STD TIT,<br>(2) 454 PE<br>(4179 kb,<br>22856 kb)              | 949,313   | 199.2 | (1) ILL<br>STD                | 44,507,806 | 3,382,593,256 | AF   | 9 / 2     | 2506520048 |
| <i>Synechococcus</i><br>sp.<br>PCC 7502       | (1) 454<br>STD TIT,<br>(3) 454 PE<br>(1102 kb,<br>9022 kb,<br>9794 kb)   | 573,805   | 166.2 | (1) ILL<br>STD                | 86,633,080 | 6,150,948,680 | MF   | 8 / 3     | 2508501041 |
| <i>Synechocystis</i> sp.<br>PCC 7509          | -                                                                        | -         | -     | (1) ILL<br>STD                | 3,753,429  | 5,832,004,000 | none | 174 / 174 | 2517572074 |
| <i>Tolypothrix</i> sp.<br>PCC 9009            | (0) 454<br>STD TIT,<br>(1) 454 PE<br>(7854 kb)                           | 920,752   | 178.4 | (1) ILL<br>STD                | 72,204,518 | 5,487,543,368 | AF   | 167 / 204 | 2504756053 |
| <i>Xenococcus</i> sp.<br>PCC 7305             | -                                                                        | -         | -     | (1) ILL<br>STD                | 9,298,704  | 7,029,000,000 | none | 234 / 225 | 2508501034 |
| Unidentified<br>cyanobacterium<br>PCC 7702    | -                                                                        | -         | -     | (1) ILL<br>STD, (1)<br>ILL PE | 45,267,538 | 6,790,130,000 | none | 49 / 4    | 2512564012 |

**Dataset S1. Metadata information for all cyanobacteria used in this study**

This table is available separately as SI\_DatasetS1.xls.

**Dataset S2. Distribution of protein orthologs involved in cell division and cell differentiation**

A. Putative protein orthologs involved in cell division and morphogenesis B. Putative protein orthologs involved in cell differentiation. The 126 genomes were taken into account for the establishment of the core genes (*C*) for the cell division process, whereas only the organisms belonging to Subsections IV and V were considered to define the core genes for heterocyst differentiation. Seed proteins were downloaded from the cyanobase (<http://genome.kazusa.or.jp/cyanobase>) or used according to Campbell et al, 2003 (60), Lehner et al, 2011 (61), and Zhou et al, 2002 (62).

This table is available separately as SI\_DatasetS2.xls.

**Dataset S3. Predicted eukaryotic genes of cyanobacterial descent**

This dataset is available separately as SI\_DatasetS3.xls.

## References:

1. Bennett S (2004) Solexa Ltd. *Pharmacogenomics* 5:433-438.
2. Margulies M, *et al.* (2005) Genome sequencing in microfabricated high-density picolitre reactors. *Nature* 437:376-380.
3. Zerbino DR & Birney E (2008) Velvet: Algorithms for de novo short read assembly using de Bruijn graphs. *Genome Res* 18:821-829.
4. Ewing B & Green P (1998) Base-calling of automated sequencer traces using Phred. II. Error probabilities. *Genome Res* 8:186-194.
5. Ewing B, Hillier L, Wendl MC, & Green P (1998) Base-calling of automated sequencer traces using Phred. I. Accuracy assessment. *Genome Res* 8:175-185.
6. Gordon D, Abajian C, & Green P (1998) Consed: a graphical tool for sequence finishing. *Genome Res* 8:195-202.
7. Han C & Chain P (2006) Finishing repeat regions automatically with Dupfinisher. *Proceeding of the 2006 international conference on bioinformatics & computational biology.*, eds Arabnia HR & Valafar H (CSREA Press), pp 141-146.
8. Gnerre S, *et al.* (2010) High-quality draft assemblies of mammalian genomes from massively parallel sequence data. *Proc Natl Acad Sci USA* 108:1513-1518.
9. Hyatt D, *et al.* (2010) Prodigal: prokaryotic gene recognition and translation initiation site identification. *BMC Bioinformatics* 11:119.
10. Pati A, *et al.* (2010) GenePRIMP: a gene prediction improvement pipeline for prokaryotic genomes. *Nat Methods* 7:455-457.
11. Lowe TM & Eddy SR (1997) tRNAscan-SE: a program for improved detection of transfer RNA genes in genomic sequence. *Nucleic Acids Res* 25:955-964.
12. Pruesse E, *et al.* (2007) SILVA: a comprehensive online resource for quality checked and aligned ribosomal RNA sequence data compatible with ARB. *Nucleic Acids Res* 35:7188-7196.
13. Markowitz VM, *et al.* (2009) IMG ER: a system for microbial genome annotation expert review and curation. *Bioinformatics* 25:2271-2278.
14. Wu M & Eisen JA (2008) A simple, fast, and accurate method of phylogenomic inference. *Genome Biol* 9:R151.
15. Katoh K, Kuma K-i, Toh H, & Miyata T (2005) MAFFT version 5: improvement in accuracy of multiple sequence alignment. *Nucleic Acids Res* 33:511-518.
16. Eddy SR (1998) Profile hidden markov models. *Bioinformatics* 14:755-763.
17. Sonnhammer E & Hollich V (2005) Scoredist: A simple and robust protein sequence distance estimator. *BMC Bioinformatics* 6:108.
18. Guindon S, *et al.* (2010) New algorithms and methods to estimate maximum-likelihood phylogenies: assessing the performance of PhyML 3.0. *Sys Biol* 59:307-321.
19. Abascal F, Zardoya R, & Posada D (2005) ProtTest: selection of best-fit models of protein evolution. *Bioinformatics* 21:2104-2105.
20. Colless DH (1982) Phylogenetics: The theory and practice of phylogenetic systematics. *Syst Zool* 31:100-104.
21. Maddison WP & Maddison DR (2011) Mesquite: A modular system for evolutionary analysis. *Version 2.75* <http://mesquiteproject.org>.

22. Lima T, *et al.* (2009) HAMAP: a database of completely sequenced microbial proteome sets and manually curated microbial protein families in UniProtKB/Swiss-Prot. *Nucleic Acids Res* 37:D471-D478.
23. Grissa I, Vergnaud G, & Pourcel C (2007) CRISPRFinder: a web tool to identify clustered regularly interspaced short palindromic repeats. *Nucleic Acids Res* 35:W52-W57.
24. Bland C, *et al.* (2007) CRISPR Recognition Tool (CRT): a tool for automatic detection of clustered regularly interspaced palindromic repeats. *BMC Bioinformatics* 8:1-8.
25. Rouhiainen L, *et al.* (2004) Genes Coding for hepatotoxic heptapeptides (Microcystins) in the cyanobacterium *Anabaena* strain 90. *Appl Environ Microbiol* 70:686-692.
26. Fewer D, *et al.* (2007) Recurrent adenylation domain replacement in the microcystin synthetase gene cluster. *BMC Evol Biol* 7:183.
27. Fewer DP, *et al.* (2011) Nostophycin biosynthesis is directed by a hybrid polyketide synthase-nonribosomal peptide synthetase in the toxic cyanobacterium *Nostoc* sp. strain 152. *Appl Environ Microbiol* 77:8034-8040.
28. Fan Q, *et al.* (2005) Clustered genes required for synthesis and deposition of envelope glycolipids in *Anabaena* sp. strain PCC 7120. *Mol Microbiol* 58:227-243.
29. Balskus EP & Walsh CT (2010) The genetic and molecular basis for sunscreen biosynthesis in cyanobacteria. *Science* 329:1653-1656.
30. Miller S, Wood A, Blankenship RE, Kim M, & Ferriera S (2011) Dynamics of gene duplication in the genomes of chlorophyll *d*-producing cyanobacteria: Implications for the ecological niche. *Genome Biol Evol* 3:601-613.
31. Swingley W, *et al.* (2008) Niche adaptation and genome expansion in the chlorophyll *d*-producing cyanobacterium *Acaryochloris marina*. *Proc Natl Acad Sci USA* 12:2005-2010.
32. Bench S, Ilikchyan I, Tripp H, & Zehr J (2011) Two strains of *Crocospaera watsonii* with highly conserved genomes are distinguished by strain-specific features. *Front Microbiol* 2:261.
33. Shi T, Ilikchyan I, Rabouille S, & Zehr J (2010) Genome-wide analysis of diel gene expression in the unicellular N<sub>2</sub>-fixing cyanobacterium *Crocospaera watsonii* WH 8501. *ISME J* 4:621-632.
34. Welsh E, *et al.* (2008) The genome of *Cyanothece* 51142, a unicellular diazotrophic cyanobacterium important in the marine nitrogen cycle. *Proc Natl Acad Sci USA* 105:15094-15099.
35. Bandyopadhyay A, *et al.* (2011) Novel metabolic attributes of the genus *Cyanothece*, comprising a group of unicellular nitrogen-fixing cyanobacteria. *mBio* 2:e00214-00211. doi:00210.01128/mBio.00214-00211.
36. Nakamura Y, *et al.* (2003) Complete genome structure of *Gloeobacter violaceus* PCC 7421, a cyanobacterium that lacks thylakoids. *DNA Res* 10:137-145.
37. Kaneko T, *et al.* (2007) Complete genomic structure of the bloom-forming toxic cyanobacterium *Microcystis aeruginosa* NIES-843. *DNA Res* 14:247-256.
38. Frangeul L, *et al.* (2008) Highly plastic genome of *Microcystis aeruginosa* PCC 7806, a ubiquitous toxic freshwater cyanobacterium. *BMC Genomics* 9:274.

39. Kettler G, *et al.* (2007) Patterns and implications of gene gain and loss in the evolution of *Prochlorococcus*. *PLoS Genet* 3:e231. doi:210.1371/journal.pgen.0030231.
40. Coleman M, *et al.* (2006) Genomic islands and the ecology and evolution of *Prochlorococcus*. *Science* 311:1768-1770.
41. Rocap G, *et al.* (2003) Genome divergence in two *Prochlorococcus* ecotypes reflects oceanic niche differentiation. *Nature* 424:1042-1047.
42. Dufresne A, *et al.* (2003) Genome sequence of the cyanobacterium *Prochlorococcus marinus* SS120, a nearly minimal oxyphototrophic genome. *Proc Natl Acad Sci USA* 100:10020-10025.
43. Donia M, *et al.* (2011) Complex microbiome underlying secondary and primary metabolism in the tunicate-*Prochloron* symbiosis. *Proc Natl Acad Sci USA* 108:E1423-1432.
44. Sugita C, *et al.* (2007) Complete nucleotide sequence of the freshwater unicellular cyanobacterium *Synechococcus elongatus* PCC 6301 chromosome: gene content and organization. *Photosynth Res* 93:55-67.
45. Dufresne A, *et al.* (2008) Unraveling the genomic mosaic of a ubiquitous genus of marine cyanobacteria. *Genome Biol* 9:R90. doi:10.1186/gb-2008-1189-1185-r1190.
46. Palenik B, *et al.* (2006) Genome sequence of *Synechococcus* CC9311: Insights into adaptation to a coastal environment. *Proc Natl Acad Sci USA* 103:13555-13559.
47. Bhaya D, *et al.* (2007) Population level functional diversity in a microbial community revealed by comparative genomic and metagenomic analyses. *ISME J* 1:703-713.
48. Palenik B, *et al.* (2003) The genome of a motile marine *Synechococcus*. *Nature* 424:1037-1042.
49. Kaneko T, *et al.* (1996) Sequence analysis of the genome of the unicellular cyanobacterium *Synechocystis* sp. strain PCC 6803. II. Sequence determination of the entire genome and assignment of potential protein-coding regions. *DNA Res* 3:109-136.
50. Nakamura Y, *et al.* (2002) Complete genome structure of the thermophilic cyanobacterium *Thermosynechococcus elongatus* BP-1. *DNA Res* 9:123-130.
51. Tripp H, *et al.* (2010) Metabolic streamlining in an open-ocean nitrogen-fixing cyanobacterium. *Nature* 464:90-94.
52. Fujisawa T, *et al.* (2010) Genomic structure of an economically important cyanobacterium, *Arthrospira* (Spirulina) *platensis* NIES-39. *DNA Res* 17:85-103.
53. Janssen P, *et al.* (2010) Genome sequence of the edible cyanobacterium *Arthrospira* sp. PCC 8005. *J Bacteriol* 192:2465-2466.
54. Starkenburg S, *et al.* (2011) Genome of the cyanobacterium *Microcoleus vaginatus* FGP-2, a photosynthetic ecosystem engineer of arid land soil biocrusts worldwide. *J Bacteriol* 193:4569-4570.
55. Jones A, *et al.* (2011) Genomic insights into the physiology and ecology of the marine filamentous cyanobacterium *Lyngbya majuscula*. *Proc Natl Acad Sci USA* 108:8815-8820.

56. Méjean A, *et al.* (2010) The genome sequence of the cyanobacterium *Oscillatoria* sp. PCC 6506 reveals several gene clusters responsible for the biosynthesis of toxins and secondary metabolites. *J Bacteriol* 192:5264-5265.
57. Stucken K, *et al.* (2010) The smallest known genomes of multicellular and toxic cyanobacteria: comparison, minimal gene sets for linked traits and the evolutionary implications. *PLoS ONE* 5:e9235.  
doi:9210.1371/journal.pone.0009235.
58. Ran L, *et al.* (2010) Genome erosion in a nitrogen-fixing vertically transmitted endosymbiotic multicellular cyanobacterium. *PLoS ONE* 5:e11486.  
doi:11410.11371/journal.pgen.0030231.
59. Kaneko T, *et al.* (2001) Complete genomic sequence of the filamentous nitrogen-fixing cyanobacterium *Anabaena* sp. strain PCC 7120. *DNA Res* 8:227-253.
60. Campbell EL, Wong FCY, & Meeks JC (2003) DNA binding properties of the HrmR protein of *Nostoc punctiforme* responsible for transcriptional regulation of genes involved in the differentiation of hormogonia. *Mol Microbiology* 47(2):573-582.
61. Lehner J, *et al.* (2011) The morphogene AmiC2 is pivotal for multicellular development in the cyanobacterium *Nostoc punctiforme*. *Mol Microbiol* 79:1655-1669.
62. Zhou R & Wolk C (2002) Identification of an akinete marker gene in *Anabaena variabilis*. *J Bacteriol* 184:2529-2532.
